# Supplementary material for: Cytoplasmic TP53INP2 acts as an apoptosis partner in TRAIL treatment: the synergistic effect of TRAIL with venetoclax in TP53INP2-positive acute myeloid leukemia
Source: PubMed Central journal article supplement (PMC11193246; doi:10.1186/s13046-024-03100-0), 2024-06-22

**Fig. 1**

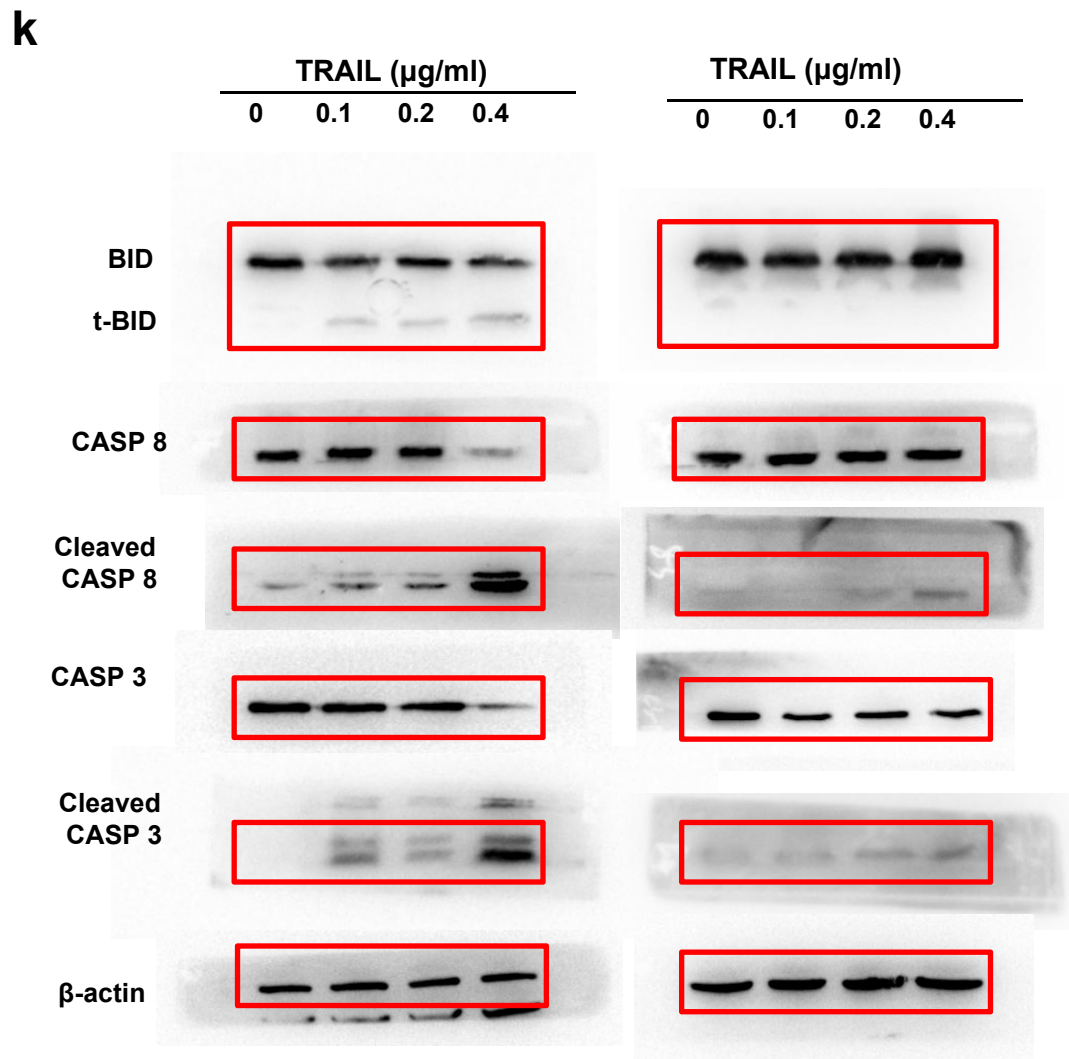

**Fig. 3**

**a**

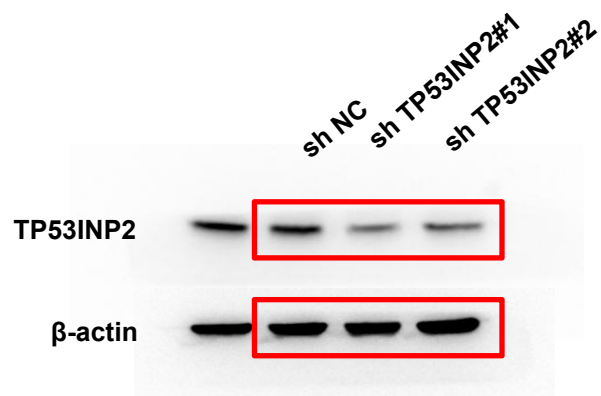

**e**

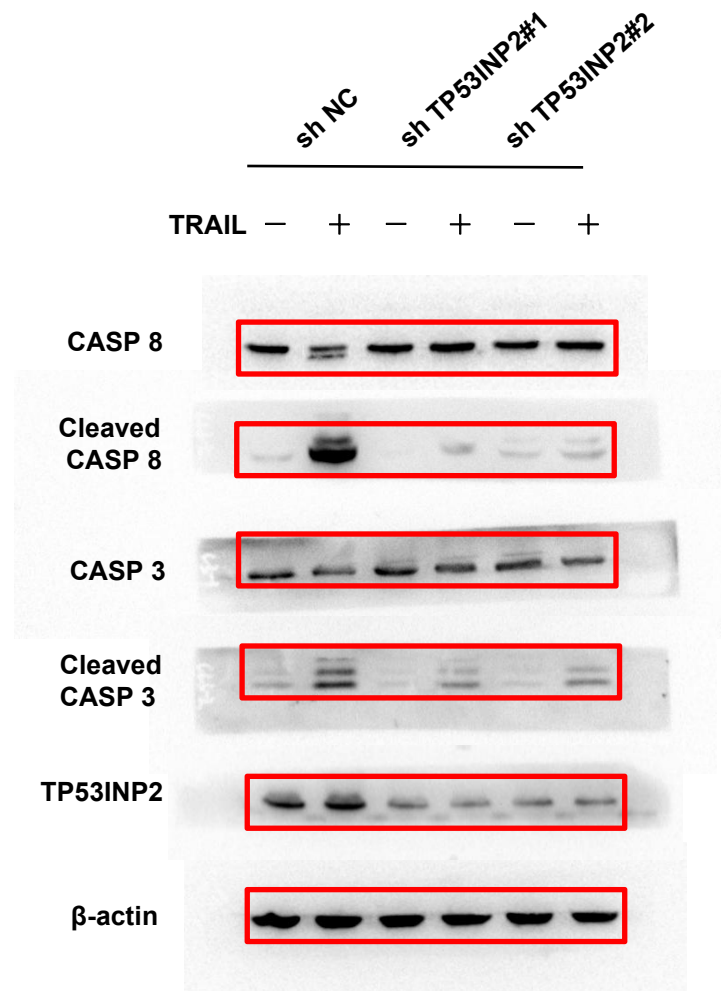

**Fig. 3**

**f**

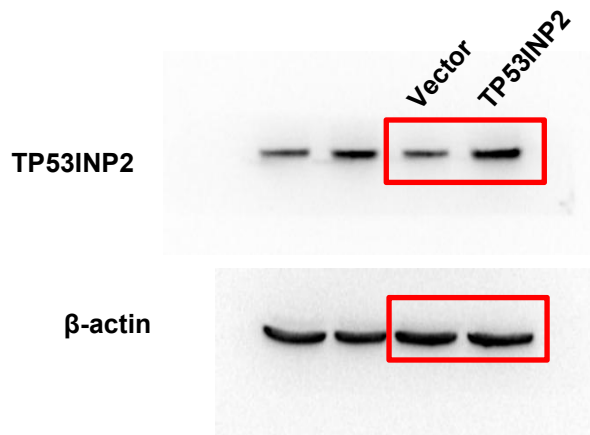

**j**

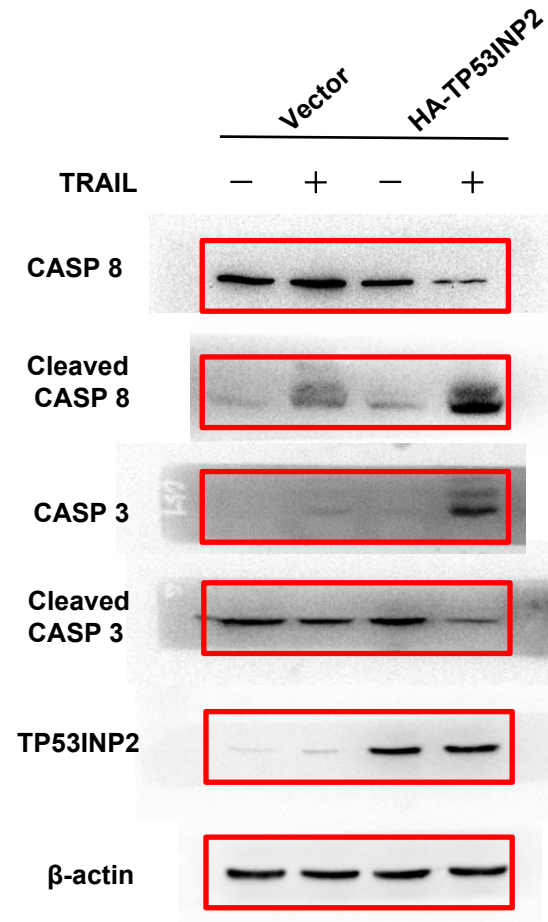

**Fig. 4**

**a**

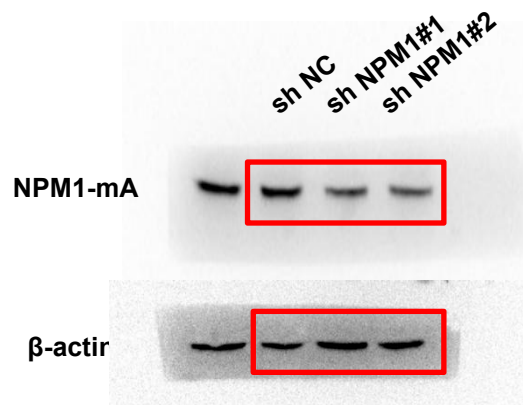

**e**

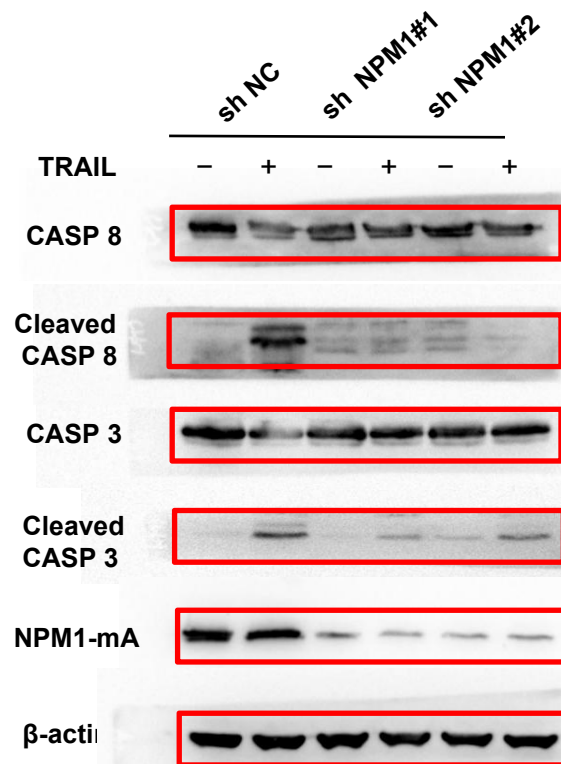

**Fig. 4**

**h**

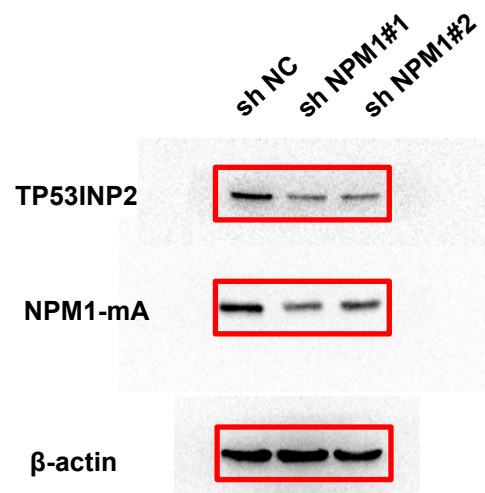

**i**

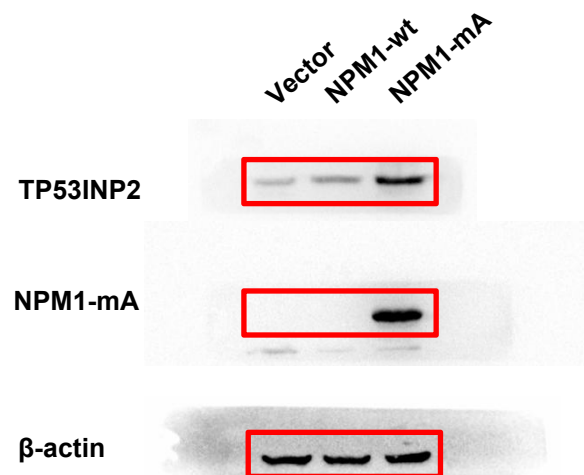

**g**

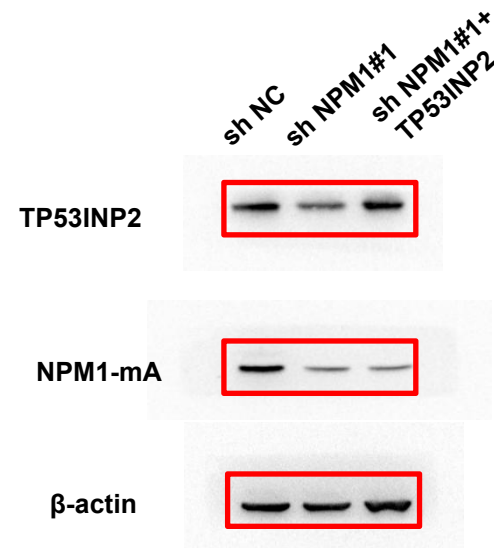

**Fig. 5**

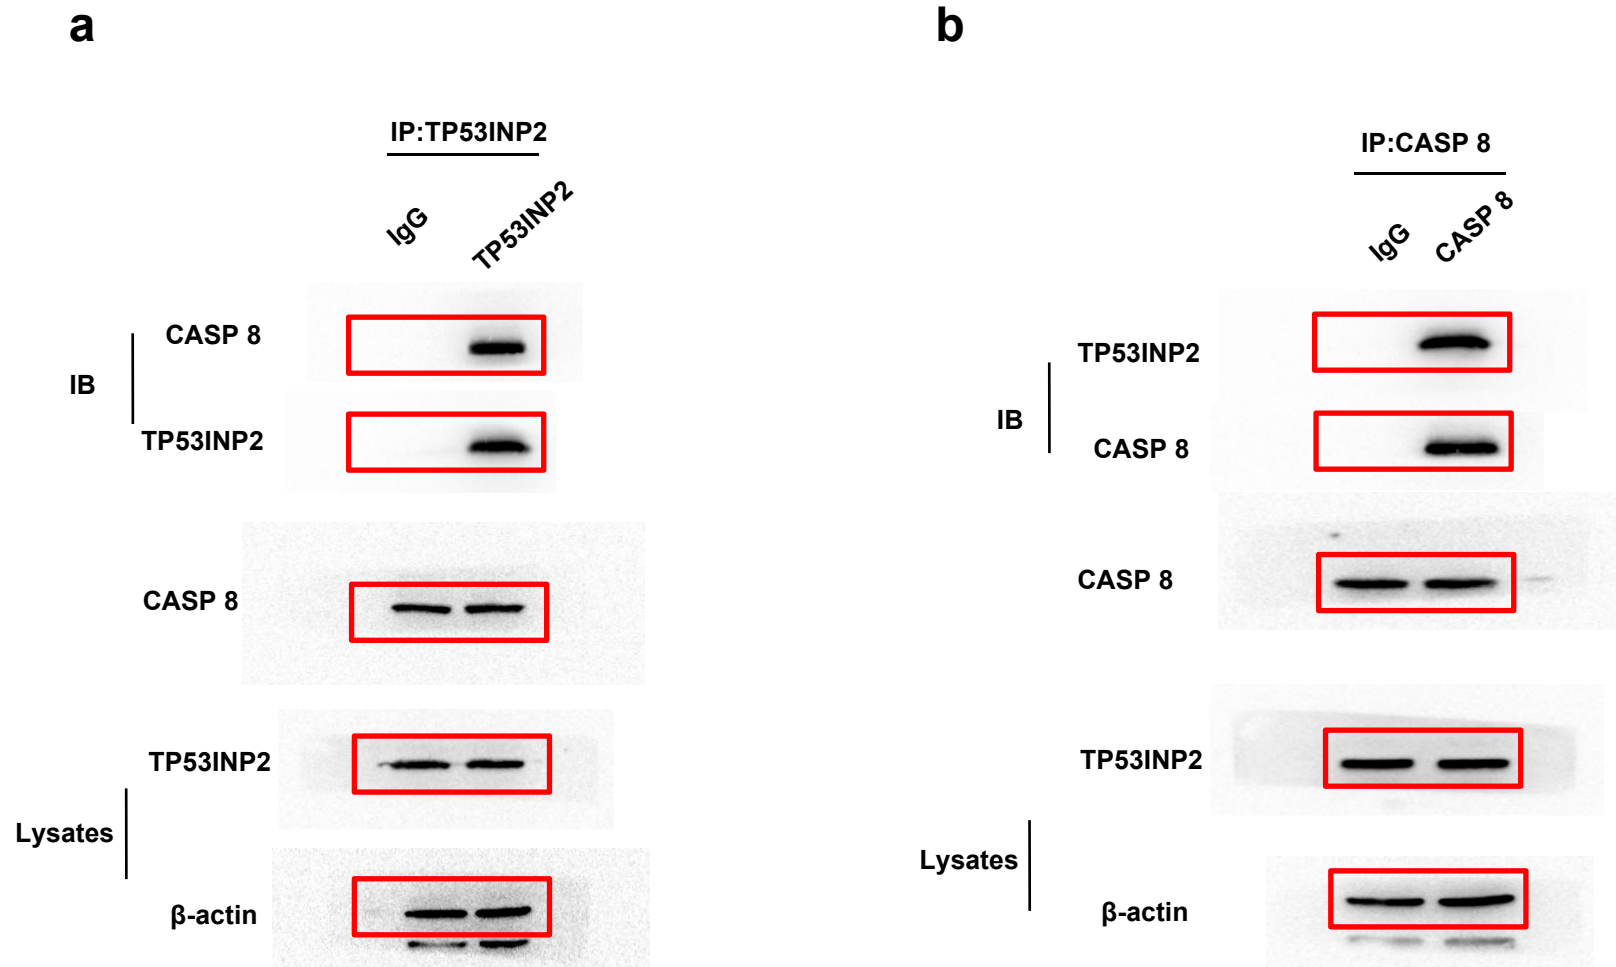

**Fig. 5**

**d**

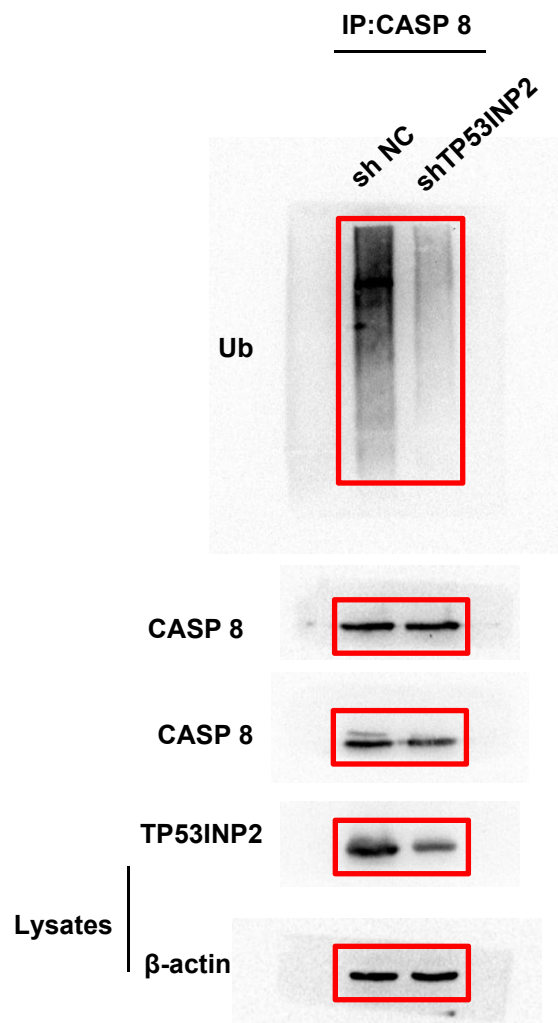

**f**

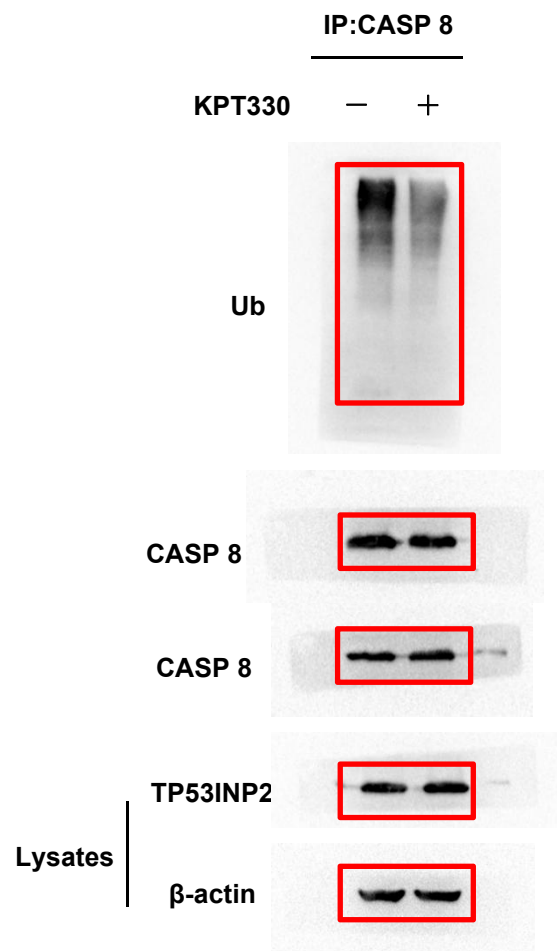

**Fig. 5**

**g**

|             | IP:CASP 8 |   |   |   |
|-------------|-----------|---|---|---|
| Flag-CASP 8 | -         | + | + | + |
| HA-TP53INP2 | -         | + | + | + |
| His-K48     | -         | - | + | - |
| His-K11     | -         | - | - | + |

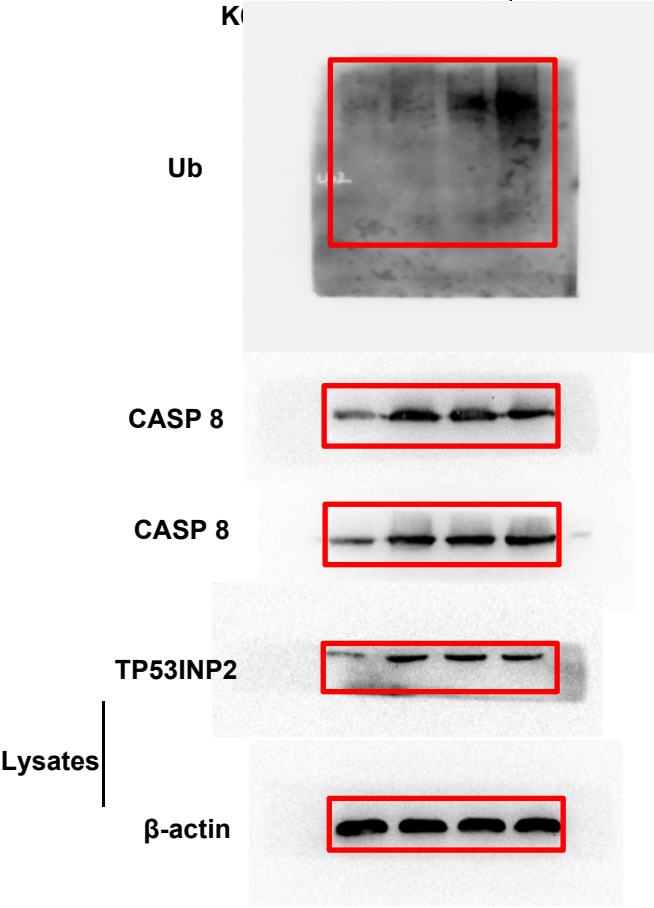

**i**

IP:TP53INP2

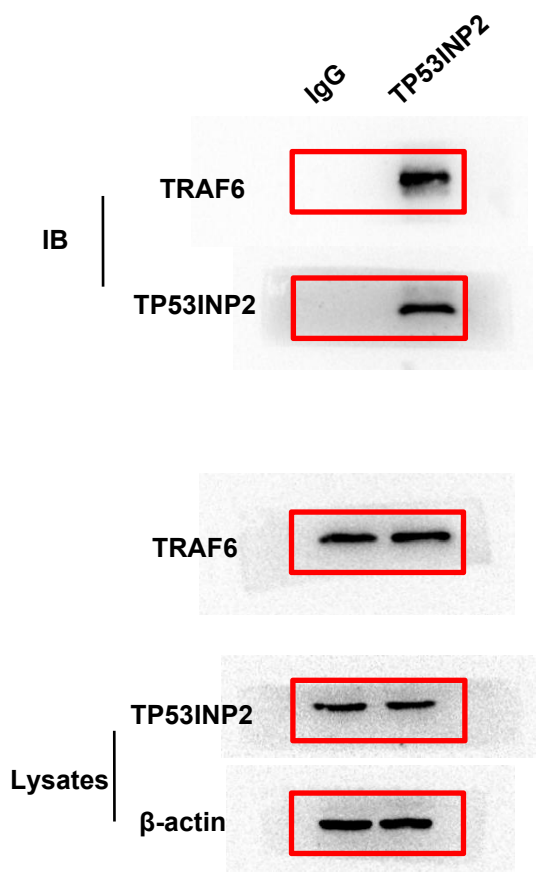

**j**

IP:TRAF6

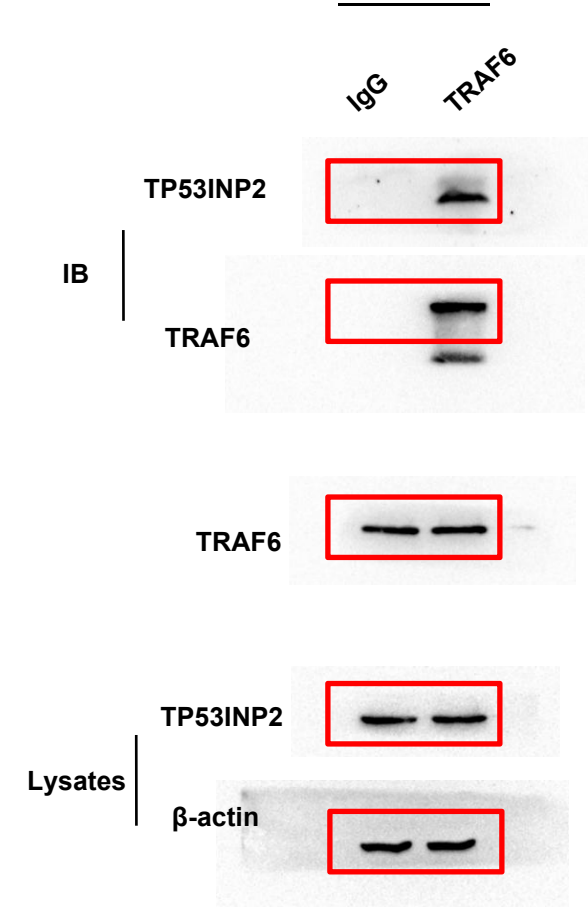



**Fig. 5**

**k**

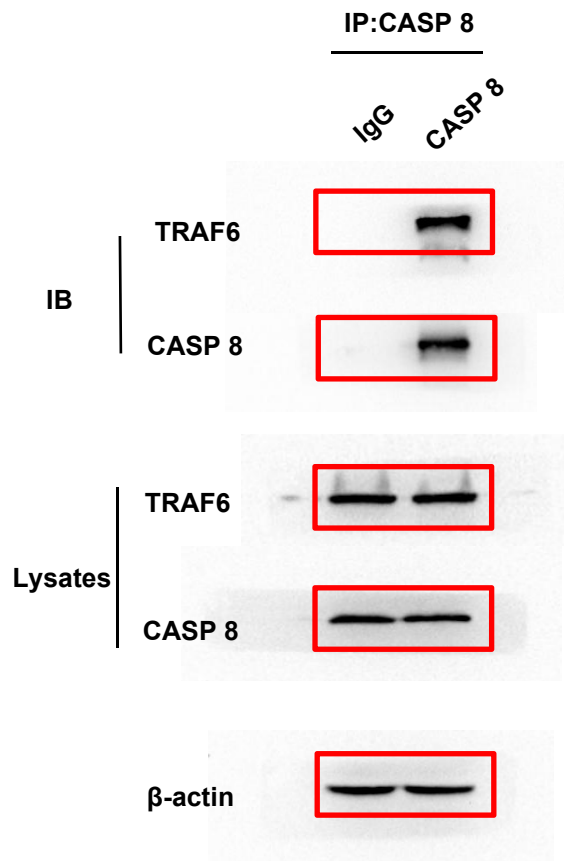

**l**

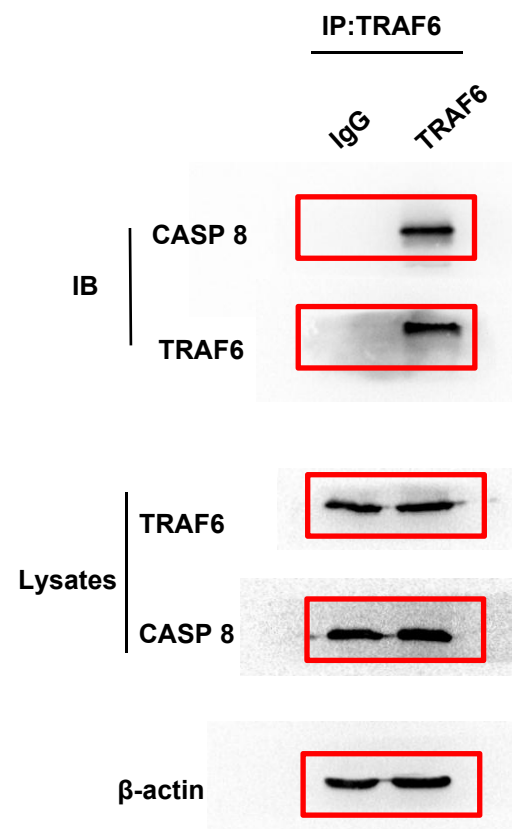

**Fig. 5**

**m**

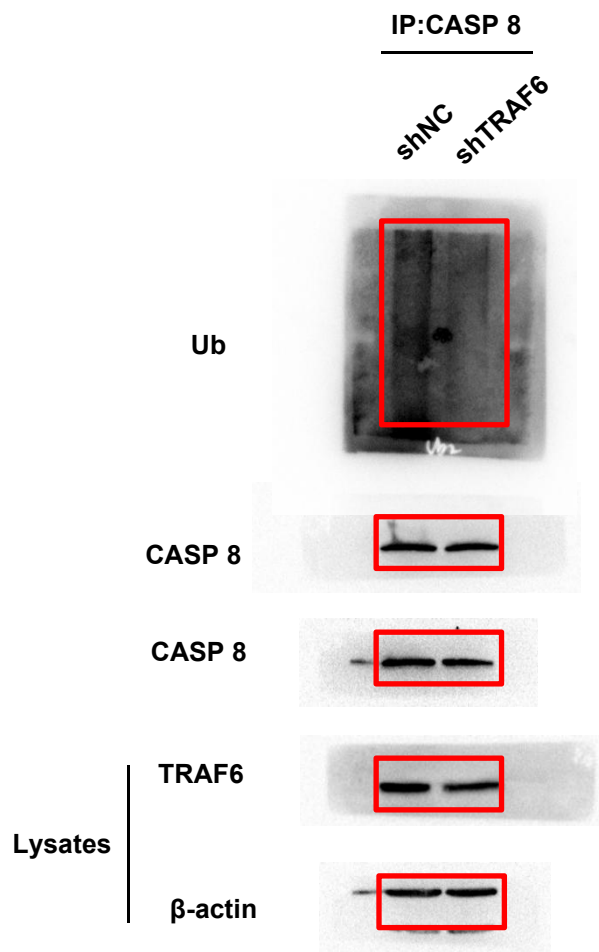

**n**

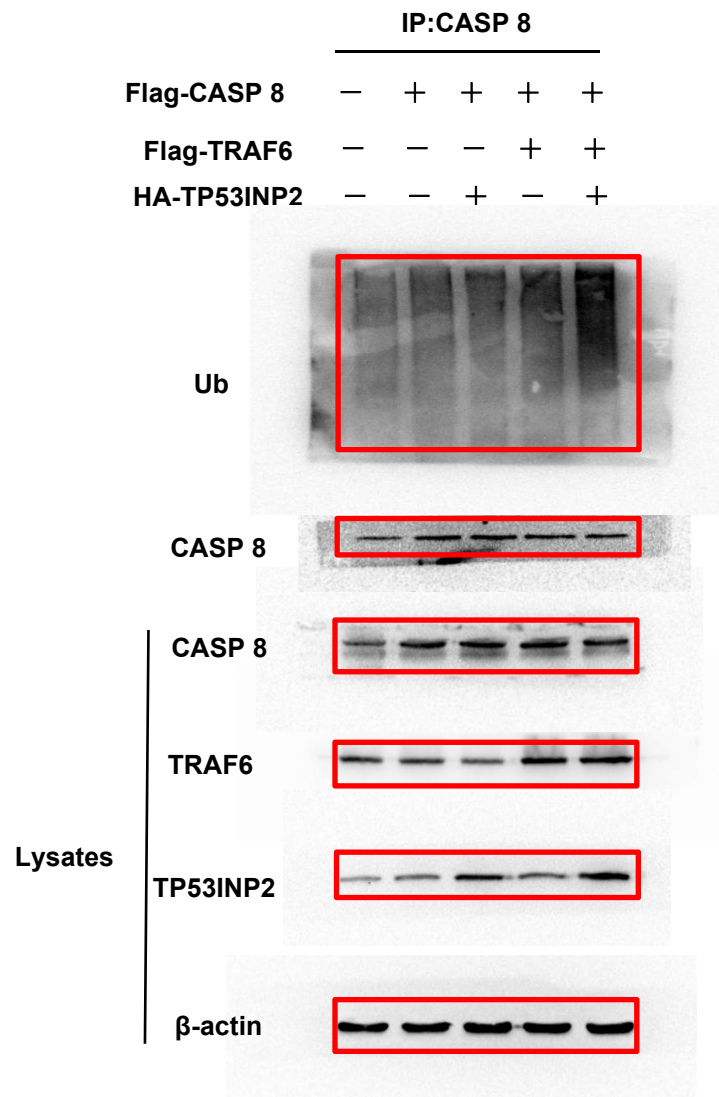

**Fig. S1**

**a** **c**

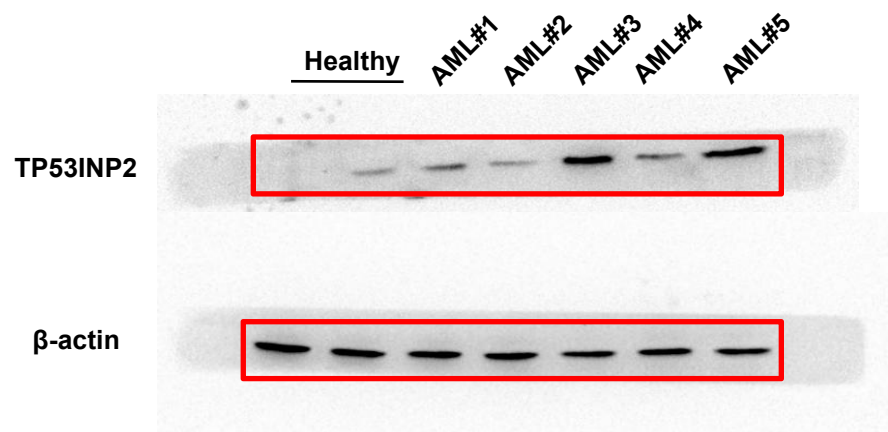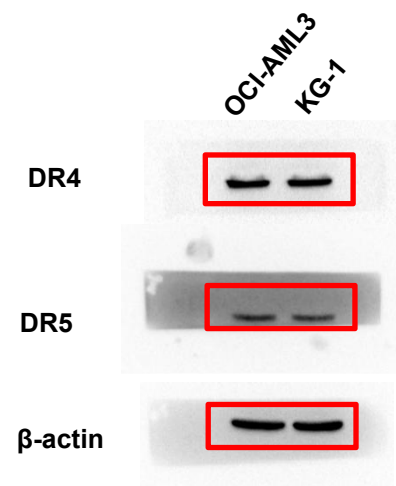

**Fig. S2**

**a**

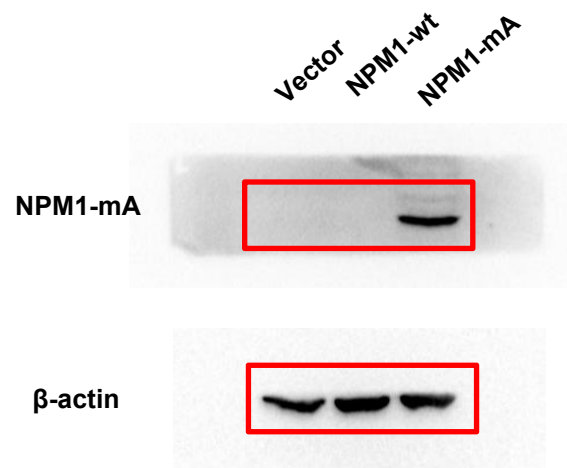

**e**

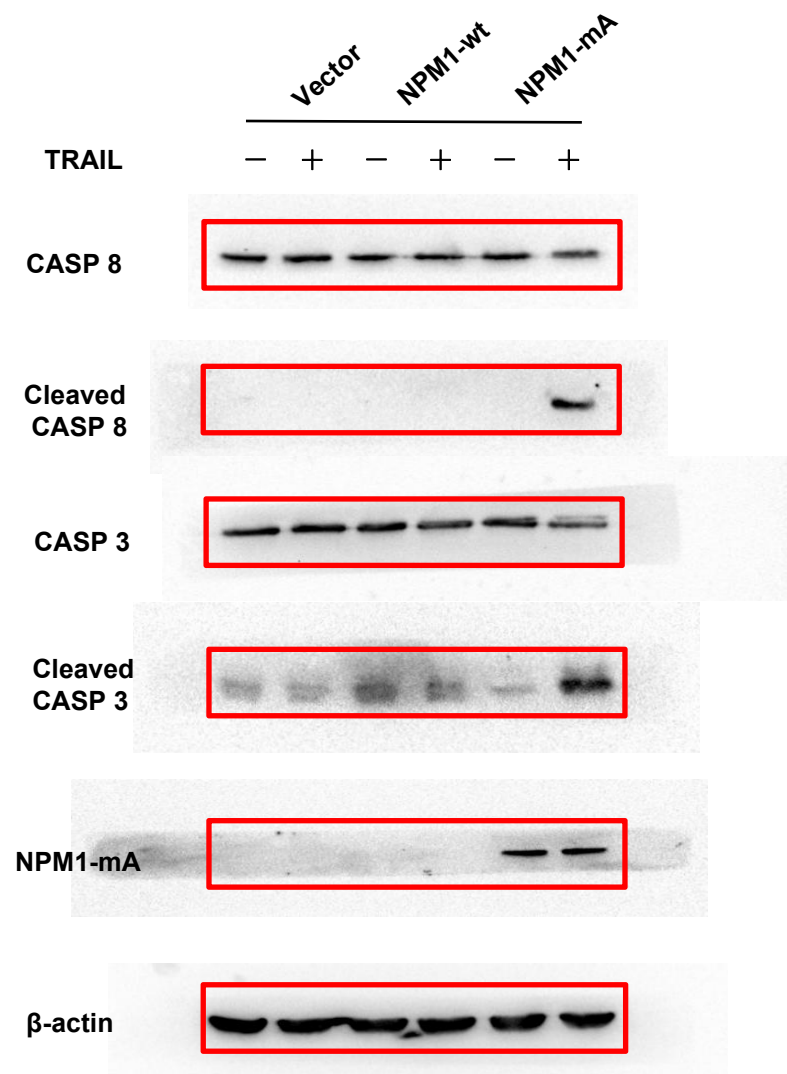

**Fig. S3**

**a**

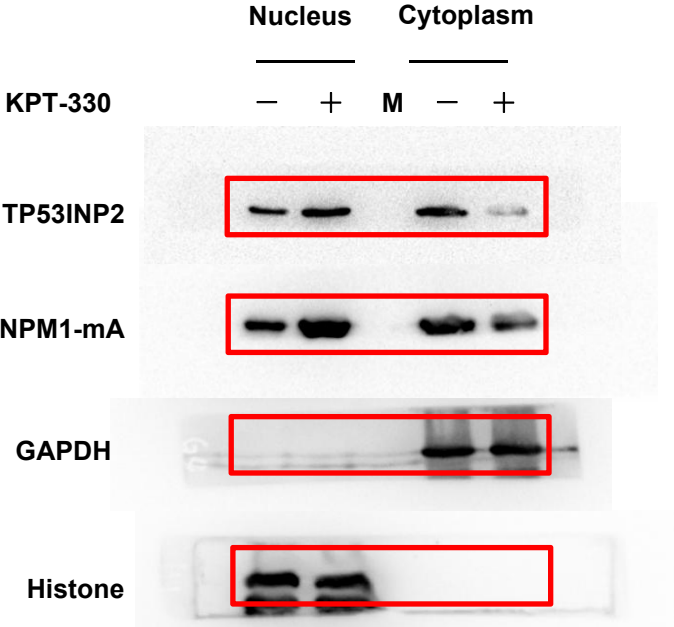

Supplement: 13046_2024_3100_MOESM7_ESM.pdf [file 13046_2024_3100_MOESM7_ESM.pdf]
