# Supplementary material for: Cytoplasmic TP53INP2 acts as an apoptosis partner in TRAIL treatment: the synergistic effect of TRAIL with venetoclax in TP53INP2-positive acute myeloid leukemia
Source: PubMed Central journal article supplement (PMC11193246; doi:10.1186/s13046-024-03100-0), 2024-06-22
Supplement: 13046_2024_3100_MOESM1_ESM.pdf [file 13046_2024_3100_MOESM1_ESM.pdf]

**Additional file 1: Table S1. Clinical characteristics of primary AML patient samples.**

| <b>Patient</b> | <b>Gender</b> | <b>Age (year)</b> | <b>Disease status</b> | <b>FAB subtype</b> | <b>Blast purity (%)</b> | <b>Gene mutation</b> |
|----------------|---------------|-------------------|-----------------------|--------------------|-------------------------|----------------------|
| AML#1          | Male          | 81                | Newly diagnosed       | M5                 | 6.39                    | CEBPA                |
| AML#2          | Female        | 28                | Newly diagnosed       | M2                 | 10.44                   | WT1                  |
| AML#3          | Female        | 55                | Newly diagnosed       | M4                 | 92.5                    | NPM1, FLT3-ITD       |
| AML#4          | Male          | 66                | Newly diagnosed       | M2                 | 16.63                   | c-KIT                |
| AML#5          | Female        | 49                | Newly diagnosed       | M4                 | 77.1                    | NPM1, DNMT3A         |
| AML#6          | Male          | 72                | Newly diagnosed       | M5                 | 62.0                    | NPM1, WT1            |
| AML#7          | Male          | 19                | Newly diagnosed       | M3                 | 19.42                   | FLT3-ITD             |
| AML#8          | Male          | 77                | Newly diagnosed       | M4                 | 53.3                    | DNMT3A, NRAS         |
| AML#9          | Female        | 24                | Newly diagnosed       | M5                 | 14.5                    | NA                   |
| AML#10         | Female        | 69                | Newly diagnosed       | M5                 | 101.2                   | CEBPA                |
| AML#11         | Male          | 62                | Newly diagnosed       | M5                 | 16.0                    | FLT3-ITD, c-KIT      |
| AML#12         | Female        | 21                | Newly diagnosed       | M1                 | 44.67                   | IDH1/IDH2            |
| AML#13         | Male          | 60                | Newly diagnosed       | M2                 | 9.60                    | NA                   |
| AML#14         | Female        | 70                | Newly diagnosed       | M5                 | 66.0                    | NRAS, c-KIT          |
| AML#15         | Male          | 82                | Newly diagnosed       | M5                 | 79.5                    | NPM1, IDH1/IDH2      |
| AML#16         | Male          | 37                | Newly diagnosed       | M4                 | 4.71                    | CEBPA                |
| AML#17         | Female        | 49                | Newly diagnosed       | M4                 | 22.03                   | FLT3-ITD             |
| AML#18         | Female        | 78                | Newly diagnosed       | M1                 | 2.83                    | NA                   |
| AML#19         | Male          | 49                | Newly diagnosed       | M4                 | 36.99                   | NPM1, CEBPA          |
| AML#20         | Male          | 67                | Newly diagnosed       | M2                 | 13.4                    | WT1, CEBPA           |

NA: not available
