# Supplementary material for: Cytoplasmic TP53INP2 acts as an apoptosis partner in TRAIL treatment: the synergistic effect of TRAIL with venetoclax in TP53INP2-positive acute myeloid leukemia
Source: PubMed Central journal article supplement (PMC11193246; doi:10.1186/s13046-024-03100-0), 2024-06-22

# Additional file 4: Figure S3

**a**

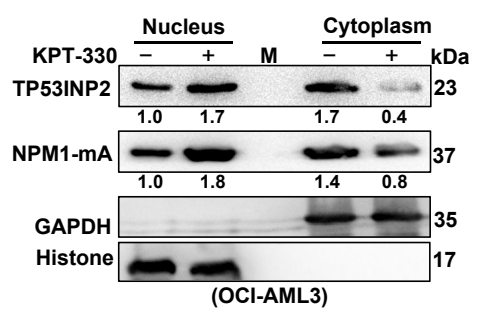

**b**

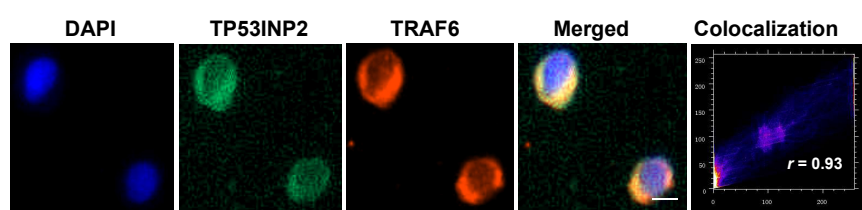

**c**

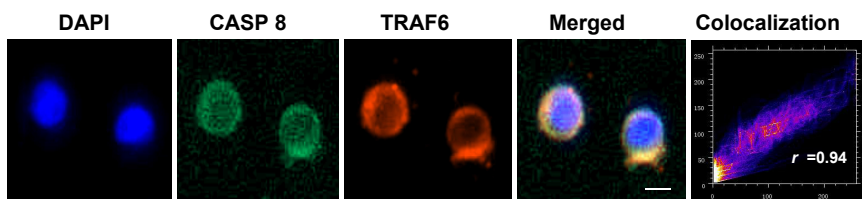

**d**

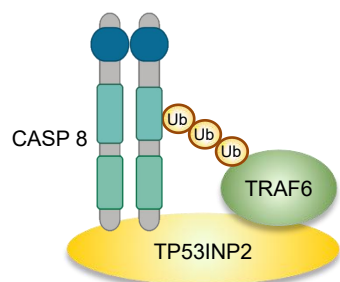

Supplement: 13046_2024_3100_MOESM4_ESM.pdf [file 13046_2024_3100_MOESM4_ESM.pdf]
