# Supplementary material for: Cytoplasmic TP53INP2 acts as an apoptosis partner in TRAIL treatment: the synergistic effect of TRAIL with venetoclax in TP53INP2-positive acute myeloid leukemia
Source: PubMed Central journal article supplement (PMC11193246; doi:10.1186/s13046-024-03100-0), 2024-06-22
Supplement: 13046_2024_3100_MOESM6_ESM.pdf [file 13046_2024_3100_MOESM6_ESM.pdf]

# Short Tandem Repeat (STR) Report

## 1. Sample info.

Sample Label: OCI-AML3

## 2. Data Interpretation

- 1) Human Cell Line Authentication Standardization of Short Tandem Repeat (STR) Profiling ASN-0002 Revised version 2021
- 2) The Pharmacopoeia of the People's Republic of China, Volume III General Requirements, Requirements for Preparation and Control of Animal Cell Substrates Used for Production of Biologics

## 3. Methodology

Sample DNA was extracted with genome extraction kit (Axygen) and PCR amplified with STR Multi-amplification Kit (MicroreaderTM21 ID System). PCR products were assayed with ABI 3730xl DNA Analyzer (Applied Biosystems®). Appropriate positive and negative controls were run and confirmed for each sample submitted. Data of 20 STR loci plus the Amelogenin locus were analyzed and extracted using Gene Mapper ID-X software and designated as the STR profile of the test sample.

## 4. Identify Result

The results of the negative and positive control match expectations.

The STR profiles of the test sample are clear, which are shown in the attached table and figure.

Test results for Multiple Alleles<sup>3</sup>: Number of multiple alleles: 0, Locus: None.

## 5. Explanation of Test Results

- 1) The submitted sample profile is human.
- 2) The submitted profile has a 100% match on 9 loci of the following human cell line(s) in DSMZ database: OCI-AML3.

**Note: This report is only responsible for the samples submitted for this inspection.**

**Conclusion: According to ATCC ASN-0002-2021, Cell lines with  $\geq 80\%$  match at 13 STR loci or  $\geq 90\%$  match at eight STR loci are considered to be related.**

**Results of database comparison (the highest percent match to the query):**

| <b>Genotyping results of STR and Amelogenin loci in cells</b> |                                    |         |         |                              |         |         |
|---------------------------------------------------------------|------------------------------------|---------|---------|------------------------------|---------|---------|
| Loci                                                          | STR information of submitted cells |         |         | STR information of cell bank |         |         |
|                                                               | Submitted cells                    |         |         | Cell bank: OCI-AML3          |         |         |
|                                                               | Allele1                            | Allele2 | Allele3 | Allele1                      | Allele2 | Allele3 |
| D19S433                                                       | 15                                 | 17      |         |                              |         |         |
| D5S818                                                        | 11                                 | 13      |         | 11                           | 13      |         |
| D21S11                                                        | 29                                 | 30      |         |                              |         |         |
| D18S51                                                        | 12                                 | 18      |         |                              |         |         |
| D6S1043                                                       | 11                                 | 13      |         |                              |         |         |
| AMEL                                                          | X                                  | X       |         | X                            | X       |         |
| D3S1358                                                       | 16                                 | 16      |         |                              |         |         |
| D13S317                                                       | 8                                  | 13      |         | 8                            | 13      |         |
| D7S820                                                        | 9                                  | 10      |         | 9                            | 10      |         |
| D16S539                                                       | 11                                 | 13      |         | 11                           | 13      |         |
| CSF1PO                                                        | 11                                 | 12      |         | 11                           | 12      |         |
| PentaD                                                        | 12                                 | 13      |         |                              |         |         |
| D2S441                                                        | 14                                 | 14      |         |                              |         |         |
| vWA                                                           | 17                                 | 18      |         | 17                           | 18      |         |
| D8S1179                                                       | 10                                 | 12      |         |                              |         |         |
| TPOX                                                          | 8                                  | 11      |         | 8                            | 11      |         |
| PentaE                                                        | 11                                 | 13      |         |                              |         |         |
| TH01                                                          | 8                                  | 10      |         | 8                            | 10      |         |
| D12S391                                                       | 20                                 | 21      |         |                              |         |         |
| D2S1338                                                       | 17                                 | 21      |         |                              |         |         |
| FGA                                                           | 22                                 | 22      |         |                              |         |         |

## Remarks

1. The short tandem repeat (STR) profile is indicative only of the sample sent to Suzhou Haixing Co., Ltd at the time it was sent. Effective peaks are real PCR bands, small peaks and non-specific bands are ignored in calculation.
2. The STR genotyping profile of the submitted cell is compared with ATCC, DSMZ and ExPASy databases, in which STR genotypes of over 100,000 human cell lines from ATCC, DSMZ, JCRB, ECACC, Riken etc. were recorded. Cells that are not included in above databases could not be compared. For failed sample, it's genotyping and figure result would be shown as NA.
3. Both mixed cultures and MSI positive cell lines can show additional STR alleles in one or more STR loci. In short, two fundamentally different causes can be the reason for multiple alleles at a locus: drifted alleles by MSI or some other DNA replication error or the presence of a mixed culture containing a contaminating second human cell line.
4. The number of STR loci shared by the submitted sample and the cells in database. Amelogenin does not belong to STR locus.
5. The matching score of DSMZ and ExPASyis "Tanabe"—  $2 \times (\text{number of alleles matching}) / (\text{total number of alleles in database profile and query sample}) \times 100\%$ . The matching score of ATCC is  $(\text{the number of shared alleles between query sample and database profile}) / (\text{total number of alleles in database profile}) \times 100\%$ .
6. The interpretation is based on "ATCC ASN-0002-2021". "Two samples are considered possibly related when their STR profiles match at 80-90% of alleles across the 13 core STR loci, as calculated using the matching algorithm. At matches of 90% or greater, the cell lines have very likely originated from the same donor. Samples between 60 and 79% match tend to be unrelated, but need may further investigation to confirm that they are unrelated. Two common causes of related cell lines scoring below 80% are (1) if the cell line has extra alleles due to it being MSI unstable, and (2) misidentification of the cell line's origin. Generally, cell lines are authentic (i.e., are derived from the same original tissue donor) when they show the expected percent match ( $\geq 80\%$  at 13 STR loci or  $> 90\%$  match at eight STR loci) to other results from that donor (tissue or other cell line samples within the database)."
7. The testing results were calculated and generated by each cell database ONLINE tool. In some case, there may be different profiles of same cell line in each database and possibly lead to different matching results. In addition, limited by the algorithm of the calculation model (the less the number of shared STR sites, the higher the probability of matching unrelated cells), non-cell line(s)human cells/sample(s) may also match to cell(s) in database. In these conditions, the comparison results in this report are for reference only.
8. The results are judged according to industry standards or consensus and can only be used for cell line inspection and authentication. We are NOT responsible for any purpose or interpretation other than the purpose specified.

Figure 1: Genotyping of STR and Amelogenin loci in cells

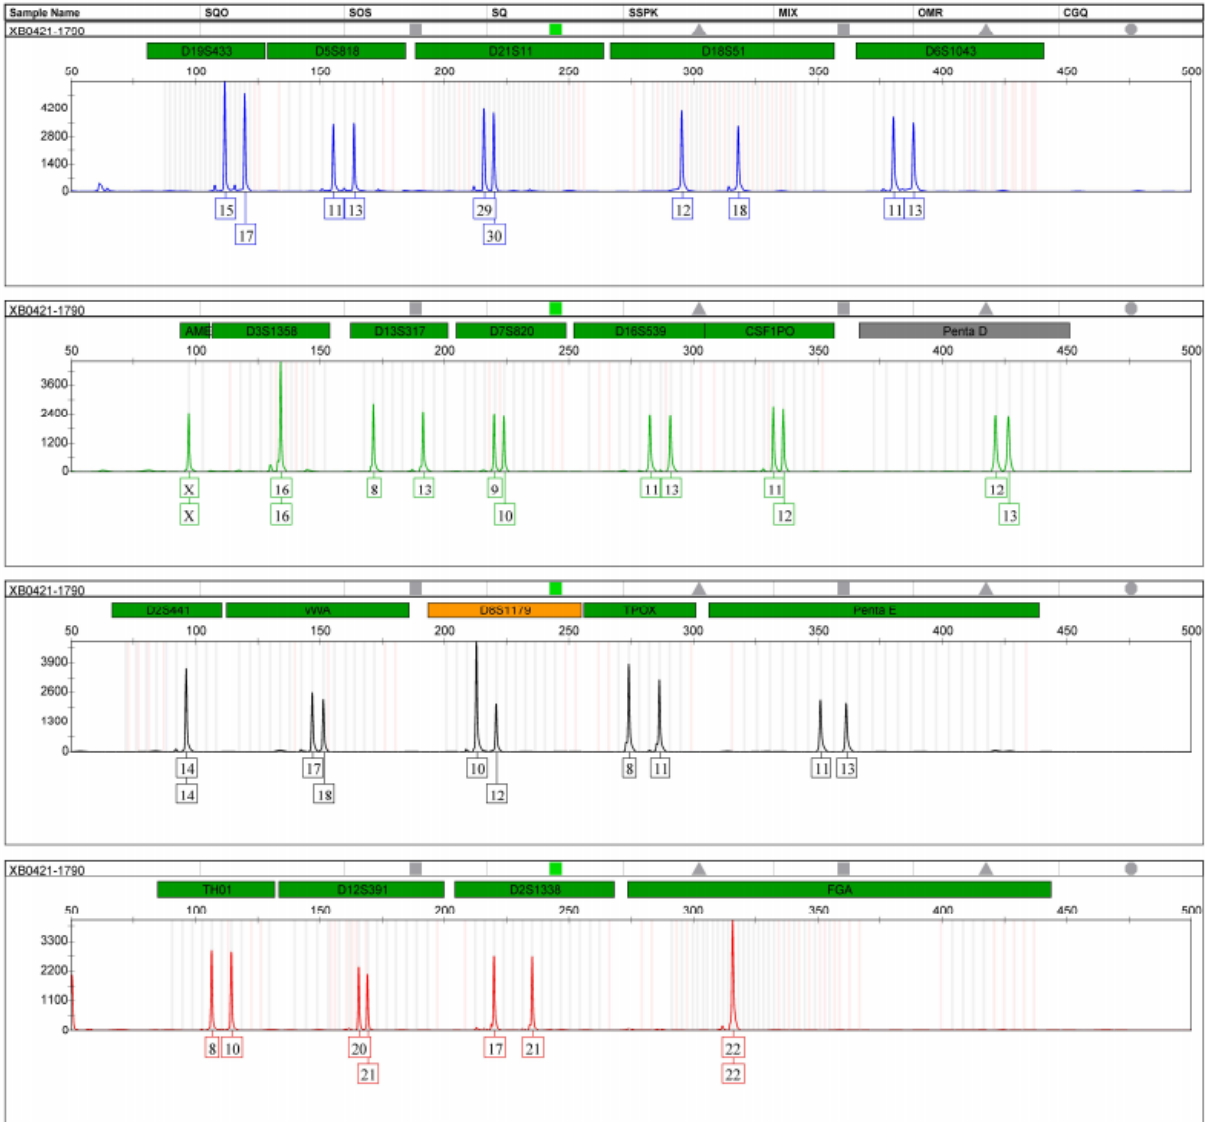

# Short Tandem Repeat (STR) Report

## 1. Sample info.

Sample Label: KG-1

## 2. Data Interpretation

- 1) Human Cell Line Authentication Standardization of Short Tandem Repeat (STR) Profiling ASN-0002 Revised version 2021
- 2) The Pharmacopoeia of the People's Republic of China, Volume III General Requirements, Requirements for Preparation and Control of Animal Cell Substrates Used for Production of Biologics

## 3. Methodology

Sample DNA was extracted with genome extraction kit (Axygen) and PCR amplified with STR Multi-amplification Kit (MicroreaderTM21 ID System). PCR products were assayed with ABI 3730xl DNA Analyzer (Applied Biosystems®). Appropriate positive and negative controls were run and confirmed for each sample submitted. Data of 20 STR loci plus the Amelogenin locus were analyzed and extracted using Gene Mapper ID-X software and designated as the STR profile of the test sample.

## 4. Identify Result

The results of the negative and positive control match expectations.

The STR profiles of the test sample are clear, which are shown in the attached table and figure.

Test results for Multiple Alleles<sup>3</sup>: Number of multiple alleles: 0, Locus: None.

## 5. Explanation of Test Results

- 1) The submitted sample profile is human.
- 2) The submitted profile has a 100% match on 9 loci of the following human cell line(s) in DSMZ database: KG-1.

**Note:** This report is only responsible for the samples submitted for this inspection.

**Conclusion:** According to ATCC ASN-0002-2021, Cell lines with  $\geq 80\%$  match at 13 STR loci or  $\geq 90\%$  match at eight STR loci are considered to be related.

**Results of database comparison (the highest percent match to the query):**

| <b>Genotyping results of STR and Amelogenin loci in cells</b> |                                    |         |         |                              |         |         |
|---------------------------------------------------------------|------------------------------------|---------|---------|------------------------------|---------|---------|
| Loci                                                          | STR information of submitted cells |         |         | STR information of cell bank |         |         |
|                                                               | Submitted cells                    |         |         | Cell bank: KG-1              |         |         |
|                                                               | Allele1                            | Allele2 | Allele3 | Allele1                      | Allele2 | Allele3 |
| D5S818                                                        | 13                                 | 13      |         | 13                           | 13      |         |
| D13S317                                                       | 11                                 | 12      |         | 11                           | 12      |         |
| D7S820                                                        | 8                                  | 10      |         | 8                            | 10      |         |
| D16S539                                                       | 10                                 | 11      |         | 10                           | 11      |         |
| VWA                                                           | 14                                 | 19      |         | 14                           | 19      |         |
| TH01                                                          | 7                                  | 8       |         | 7                            | 8       |         |
| AMEL                                                          | X                                  | Y       |         | X                            | Y       |         |
| TPOX                                                          | 7                                  | 9       |         | 7                            | 9       |         |
| CSF1PO                                                        | 7                                  | 7       |         | 7                            | 7       |         |
| D12S391                                                       | 20                                 | 21      |         |                              |         |         |
| FGA                                                           | 22                                 | 22      |         |                              |         |         |
| D2S1338                                                       | 20                                 | 23      |         |                              |         |         |
| D21S11                                                        | 28                                 | 29      |         |                              |         |         |
| D18S51                                                        | 10.2                               | 18      |         |                              |         |         |
| D8S1179                                                       | 13                                 | 14      |         |                              |         |         |
| D3S1358                                                       | 15                                 | 16      |         |                              |         |         |
| D6S1043                                                       | 18                                 | 19      |         |                              |         |         |
| PENTAE                                                        | 7                                  | 13      |         |                              |         |         |
| D19S433                                                       | 11                                 | 16.2    |         |                              |         |         |
| PENTAD                                                        | 8                                  | 9       |         |                              |         |         |
| D1S1656                                                       | 14                                 | 16.3    |         |                              |         |         |

## Remarks

1. The short tandem repeat (STR) profile is indicative only of the sample sent to Suzhou Haixing Co., Ltd at the time it was sent. Effective peaks are real PCR bands, small peaks and non-specific bands are ignored in calculation.
2. The STR genotyping profile of the submitted cell is compared with ATCC, DSMZ and ExPASy databases, in which STR genotypes of over 100,000 human cell lines from ATCC, DSMZ, JCRB, ECACC, Riken etc. were recorded. Cells that are not included in above databases could not be compared. For failed sample, it's genotyping and figure result would be shown as NA.
3. Both mixed cultures and MSI positive cell lines can show additional STR alleles in one or more STR loci. In short, two fundamentally different causes can be the reason for multiple alleles at a locus: drifted alleles by MSI or some other DNA replication error or the presence of a mixed culture containing a contaminating second human cell line.
4. The number of STR loci shared by the submitted sample and the cells in database. Amelogenin does not belong to STR locus.
5. The matching score of DSMZ and ExPASyis "Tanabe"—  $2 \times (\text{number of alleles matching}) / (\text{total number of alleles in database profile and query sample}) \times 100\%$ . The matching score of ATCC is  $(\text{the number of shared alleles between query sample and database profile}) / (\text{total number of alleles in database profile}) \times 100\%$ .
6. The interpretation is based on "ATCC ASN-0002-2021". "Two samples are considered possibly related when their STR profiles match at 80-90% of alleles across the 13 core STR loci, as calculated using the matching algorithm. At matches of 90% or greater, the cell lines have very likely originated from the same donor. Samples between 60 and 79% match tend to be unrelated, but need may further investigation to confirm that they are unrelated. Two common causes of related cell lines scoring below 80% are (1) if the cell line has extra alleles due to it being MSI unstable, and (2) misidentification of the cell line's origin. Generally, cell lines are authentic (i.e., are derived from the same original tissue donor) when they show the expected percent match ( $\geq 80\%$  at 13 STR loci or  $> 90\%$  match at eight STR loci) to other results from that donor (tissue or other cell line samples within the database)."
7. The testing results were calculated and generated by each cell database ONLINE tool. In some case, there may be different profiles of same cell line in each database and possibly lead to different matching results. In addition, limited by the algorithm of the calculation model (the less the number of shared STR sites, the higher the probability of matching unrelated cells), non-cell line(s)human cells/sample(s) may also match to cell(s) in database. In these conditions, the comparison results in this report are for reference only.
8. The results are judged according to industry standards or consensus and can only be used for cell line inspection and authentication. We are NOT responsible for any purpose or interpretation other than the purpose specified.

Figure 1: Genotyping of STR and Amelogenin loci in cells

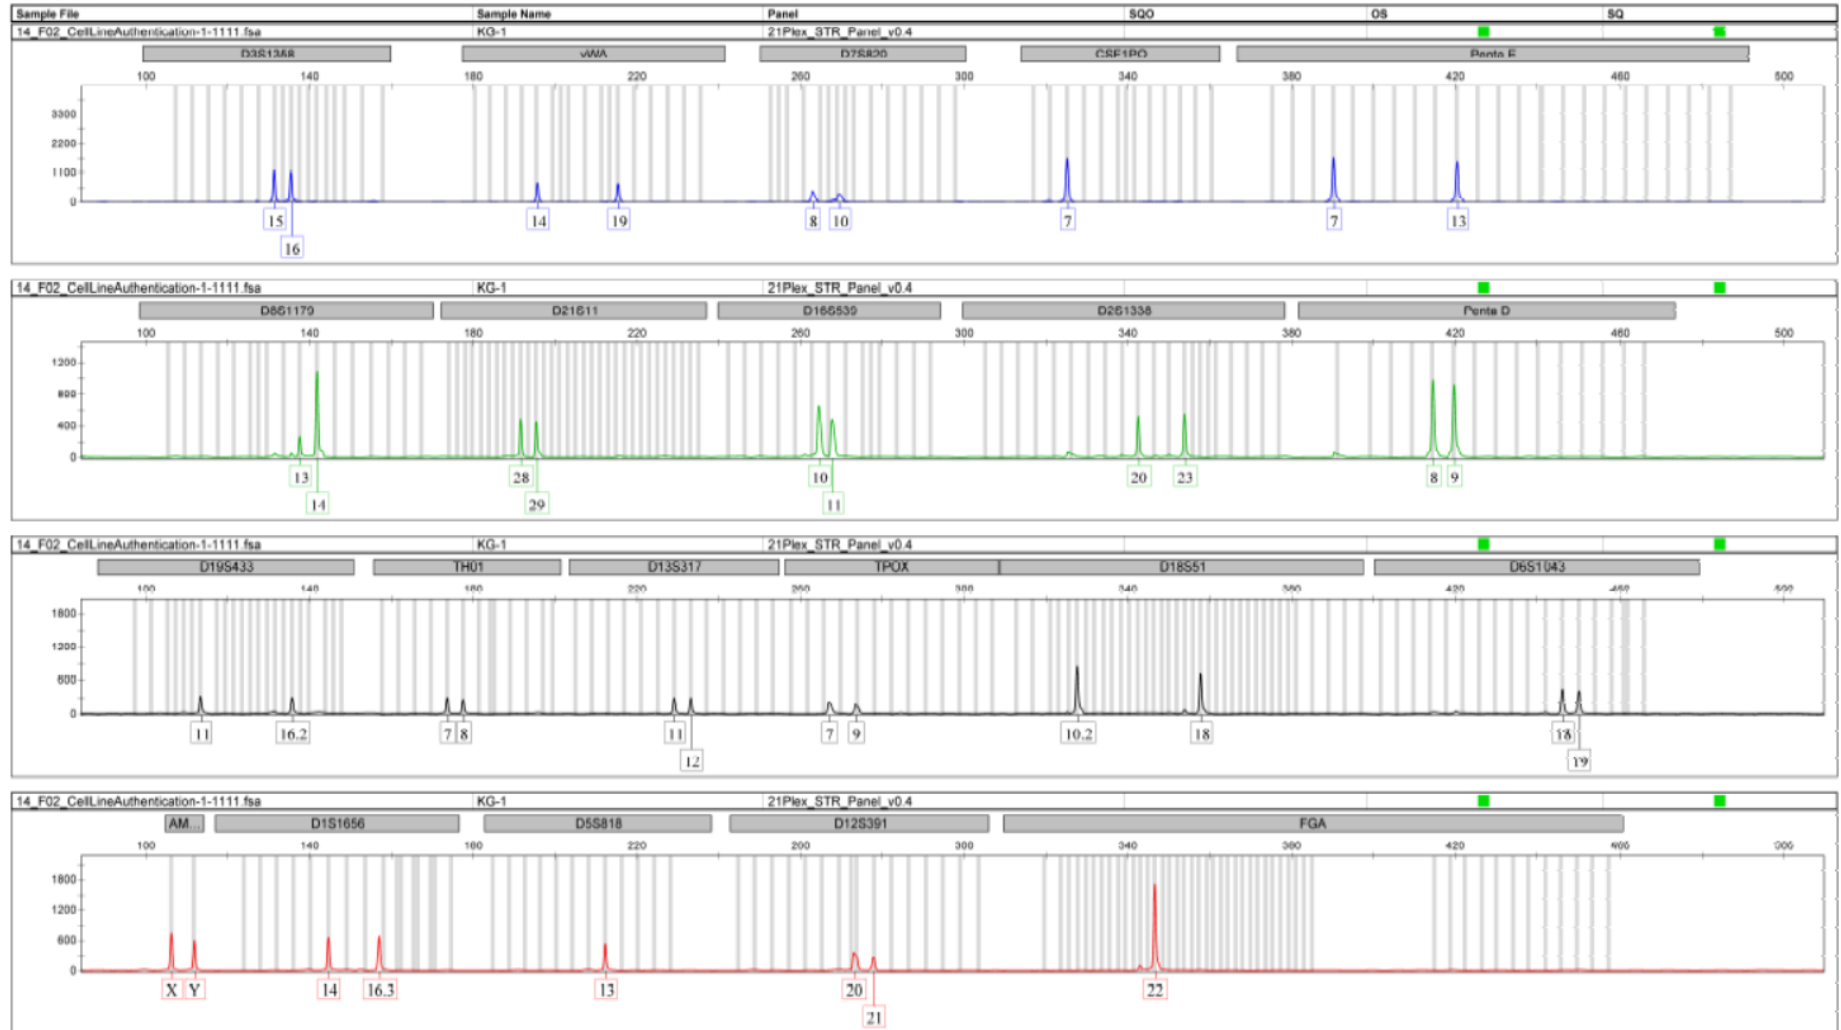



# Short Tandem Repeat (STR) Report

## 1. Sample info.

Sample Label: HL-60

## 2. Data Interpretation

- 1) Human Cell Line Authentication Standardization of Short Tandem Repeat (STR) Profiling ASN-0002 Revised version 2021
- 2) The Pharmacopoeia of the People's Republic of China, Volume III General Requirements, Requirements for Preparation and Control of Animal Cell Substrates Used for Production of Biologics

## 3. Methodology

Sample DNA was extracted with genome extraction kit (Axygen) and PCR amplified with STR Multi-amplification Kit (MicroreaderTM21 ID System). PCR products were assayed with ABI 3730xl DNA Analyzer (Applied Biosystems®). Appropriate positive and negative controls were run and confirmed for each sample submitted. Data of 20 STR loci plus the Amelogenin locus were analyzed and extracted using Gene Mapper ID-X software and designated as the STR profile of the test sample.

## 4. Identify Result

The results of the negative and positive control match expectations.

The STR profiles of the test sample are clear, which are shown in the attached table and figure.

Test results for Multiple Alleles<sup>3</sup>: Number of multiple alleles: 0, Locus: None.

## 5. Explanation of Test Results

- 1) The submitted sample profile is human.
- 2) The submitted profile has a 100% match on 9 loci of the following human cell line(s) in DSMZ database: HL60.

**Note:** This report is only responsible for the samples submitted for this inspection.

**Conclusion:** According to ATCC ASN-0002-2021, Cell lines with  $\geq 80\%$  match at 13 STR loci or  $\geq 90\%$  match at eight STR loci are considered to be related.

**Results of database comparison (the highest percent match to the query):**

| Genotyping results of STR and Amelogenin loci in cells |                                    |         |         |                              |         |         |
|--------------------------------------------------------|------------------------------------|---------|---------|------------------------------|---------|---------|
| Loci                                                   | STR information of submitted cells |         |         | STR information of cell bank |         |         |
|                                                        | Submitted cells                    |         |         | Cell bank: HL-60             |         |         |
|                                                        | Allele1                            | Allele2 | Allele3 | Allele1                      | Allele2 | Allele3 |
| D5S818                                                 | 12                                 | 12      |         | 12                           | 12      |         |
| D13S317                                                | 8                                  | 11      |         | 8                            | 11      |         |
| D7S820                                                 | 11                                 | 12      |         | 11                           | 12      |         |
| D16S539                                                | 11                                 | 11      |         | 11                           | 11      |         |
| VWA                                                    | 16                                 | 16      |         | 16                           | 16      |         |
| TH01                                                   | 7                                  | 8       |         | 7                            | 8       |         |
| AMEL                                                   | X                                  | X       |         | X                            | X       |         |
| TPOX                                                   | 8                                  | 11      |         | 8                            | 11      |         |
| CSF1PO                                                 | 13                                 | 14      |         | 13                           | 14      |         |
| D12S391                                                | 18                                 | 20      |         |                              |         |         |
| FGA                                                    | 22                                 | 24      |         |                              |         |         |
| D2S1338                                                | 17                                 | 17      |         |                              |         |         |
| D21S11                                                 | 29                                 | 30      |         |                              |         |         |
| D18S51                                                 | 14                                 | 15      |         |                              |         |         |
| D8S1179                                                | 12                                 | 13      |         |                              |         |         |
| D3S1358                                                | 16                                 | 16      |         |                              |         |         |
| D6S1043                                                | 11                                 | 12      |         |                              |         |         |
| PENTAE                                                 | 13                                 | 14      |         |                              |         |         |
| D19S433                                                | 14                                 | 14      |         |                              |         |         |
| PENTAD                                                 | 10                                 | 12      |         |                              |         |         |
| D1S1656                                                | 15                                 | 15      |         |                              |         |         |

## Remarks

1. The short tandem repeat (STR) profile is indicative only of the sample sent to Suzhou Haixing Co., Ltd at the time it was sent. Effective peaks are real PCR bands, small peaks and non-specific bands are ignored in calculation.
2. The STR genotyping profile of the submitted cell is compared with ATCC, DSMZ and ExPASy databases, in which STR genotypes of over 100,000 human cell lines from ATCC, DSMZ, JCRB, ECACC, Riken etc. were recorded. Cells that are not included in above databases could not be compared. For failed sample, it's genotyping and figure result would be shown as NA.
3. Both mixed cultures and MSI positive cell lines can show additional STR alleles in one or more STR loci. In short, two fundamentally different causes can be the reason for multiple alleles at a locus: drifted alleles by MSI or some other DNA replication error or the presence of a mixed culture containing a contaminating second human cell line.
4. The number of STR loci shared by the submitted sample and the cells in database. Amelogenin does not belong to STR locus.
5. The matching score of DSMZ and ExPASyis "Tanabe"—  $2 \times (\text{number of alleles matching}) / (\text{total number of alleles in database profile and query sample}) \times 100\%$ . The matching score of ATCC is  $(\text{the number of shared alleles between query sample and database profile}) / (\text{total number of alleles in database profile}) \times 100\%$ .
6. The interpretation is based on "ATCC ASN-0002-2021". "Two samples are considered possibly related when their STR profiles match at 80-90% of alleles across the 13 core STR loci, as calculated using the matching algorithm. At matches of 90% or greater, the cell lines have very likely originated from the same donor. Samples between 60 and 79% match tend to be unrelated, but need may further investigation to confirm that they are unrelated. Two common causes of related cell lines scoring below 80% are (1) if the cell line has extra alleles due to it being MSI unstable, and (2) misidentification of the cell line's origin. Generally, cell lines are authentic (i.e., are derived from the same original tissue donor) when they show the expected percent match ( $\geq 80\%$  at 13 STR loci or  $> 90\%$  match at eight STR loci) to other results from that donor (tissue or other cell line samples within the database)."
7. The testing results were calculated and generated by each cell database ONLINE tool. In some case, there may be different profiles of same cell line in each database and possibly lead to different matching results. In addition, limited by the algorithm of the calculation model (the less the number of shared STR sites, the higher the probability of matching unrelated cells), non-cell line(s)human cells/sample(s) may also match to cell(s) in database. In these conditions, the comparison results in this report are for reference only.
8. The results are judged according to industry standards or consensus and can only be used for cell line inspection and authentication. We are NOT responsible for any purpose or interpretation other than the purpose specified.

Figure 1: Genotyping of STR and Amelogenin loci in cells

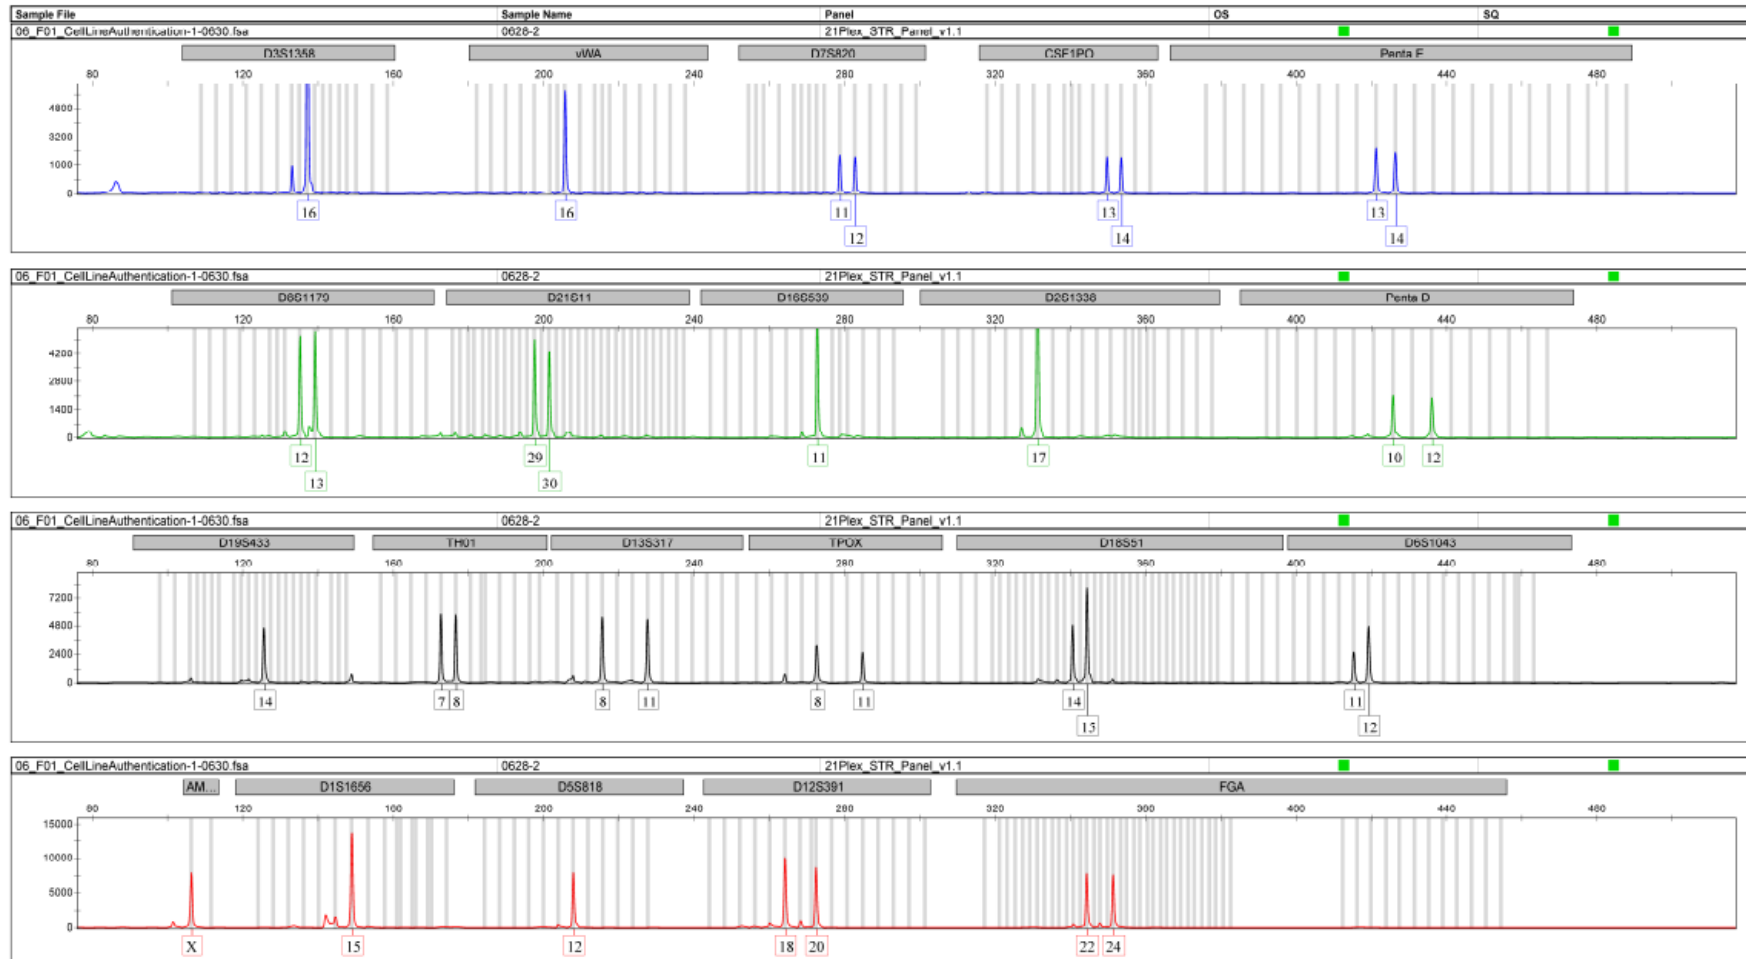

# Short Tandem Repeat (STR) Report

## 1. Sample info.

Sample Label: NB4

## 2. Data Interpretation

- 1) Human Cell Line Authentication Standardization of Short Tandem Repeat (STR) Profiling ASN-0002 Revised version 2021
- 2) The Pharmacopoeia of the People's Republic of China, Volume III General Requirements, Requirements for Preparation and Control of Animal Cell Substrates Used for Production of Biologics

## 3. Methodology

Sample DNA was extracted with genome extraction kit (Axygen) and PCR amplified with STR Multi-amplification Kit (MicroreaderTM21 ID System). PCR products were assayed with ABI 3730xl DNA Analyzer (Applied Biosystems®). Appropriate positive and negative controls were run and confirmed for each sample submitted. Data of 20 STR loci plus the Amelogenin locus were analyzed and extracted using Gene Mapper ID-X software and designated as the STR profile of the test sample.

## 4. Identify Result

The results of the negative and positive control match expectations.

The STR profiles of the test sample are clear, which are shown in the attached table and figure.

Test results for Multiple Alleles<sup>3</sup>: Number of multiple alleles: 0, Locus: None.

## 5. Explanation of Test Results

- 1) The submitted sample profile is human.
- 2) The submitted profile has a 100% match on 9 loci of the following human cell line(s) in DSMZ database: NB4.

**Note: This report is only responsible for the samples submitted for this inspection.**

**Conclusion: According to ATCC ASN-0002-2021, Cell lines with  $\geq 80\%$  match at 13 STR loci or  $\geq 90\%$  match at eight STR loci are considered to be related.**

**Results of database comparison (the highest percent match to the query):**

| Genotyping results of STR and Amelogenin loci in cells |                                    |         |         |                              |         |         |
|--------------------------------------------------------|------------------------------------|---------|---------|------------------------------|---------|---------|
| Loci                                                   | STR information of submitted cells |         |         | STR information of cell bank |         |         |
|                                                        | Submitted cells                    |         |         | Cell bank: NB4               |         |         |
|                                                        | Allele1                            | Allele2 | Allele3 | Allele1                      | Allele2 | Allele3 |
| D5S818                                                 | 13                                 | 13      |         | 13                           | 13      |         |
| D13S317                                                | 11                                 | 12      |         | 11                           | 12      |         |
| D7S820                                                 | 10                                 | 13      |         | 10                           | 13      |         |
| D16S539                                                | 9                                  | 9       |         | 9                            | 9       |         |
| VWA                                                    | 16                                 | 19      |         | 16                           | 19      |         |
| TH01                                                   | 7                                  | 9.3     |         | 7                            | 9.3     |         |
| AMEL                                                   | X                                  | X       |         | X                            | X       |         |
| TPOX                                                   | 8                                  | 11      |         | 8                            | 11      |         |
| CSF1PO                                                 | 11                                 | 12      |         | 11                           | 12      |         |
| D12S391                                                | 19                                 | 22      |         |                              |         |         |
| FGA                                                    | 21                                 | 22      |         |                              |         |         |
| D2S1338                                                | 20                                 | 25      |         |                              |         |         |
| D21S11                                                 | 28                                 | 33.2    |         |                              |         |         |
| D18S51                                                 | 12                                 | 12      |         |                              |         |         |
| D8S1179                                                | 10                                 | 10      |         |                              |         |         |
| D3S1358                                                | 15                                 | 17      |         |                              |         |         |
| D6S1043                                                | 12                                 | 12      |         |                              |         |         |
| PENTAE                                                 | 7                                  | 13      |         |                              |         |         |
| D19S433                                                | 15                                 | 15      |         |                              |         |         |
| PENTAD                                                 | 10                                 | 13      |         |                              |         |         |
| D1S1656                                                | 12                                 | 15      |         |                              |         |         |

## Remarks

1. The short tandem repeat (STR) profile is indicative only of the sample sent to Suzhou Haixing Co., Ltd at the time it was sent. Effective peaks are real PCR bands, small peaks and non-specific bands are ignored in calculation.
2. The STR genotyping profile of the submitted cell is compared with ATCC, DSMZ and ExPASy databases, in which STR genotypes of over 100,000 human cell lines from ATCC, DSMZ, JCRB, ECACC, Riken etc. were recorded. Cells that are not included in above databases could not be compared. For failed sample, it's genotyping and figure result would be shown as NA.
3. Both mixed cultures and MSI positive cell lines can show additional STR alleles in one or more STR loci. In short, two fundamentally different causes can be the reason for multiple alleles at a locus: drifted alleles by MSI or some other DNA replication error or the presence of a mixed culture containing a contaminating second human cell line.
4. The number of STR loci shared by the submitted sample and the cells in database. Amelogenin does not belong to STR locus.
5. The matching score of DSMZ and ExPASyis "Tanabe"—  $2 \times (\text{number of alleles matching}) / (\text{total number of alleles in database profile and query sample}) \times 100\%$ . The matching score of ATCC is  $(\text{the number of shared alleles between query sample and database profile}) / (\text{total number of alleles in database profile}) \times 100\%$ .
6. The interpretation is based on "ATCC ASN-0002-2021". "Two samples are considered possibly related when their STR profiles match at 80-90% of alleles across the 13 core STR loci, as calculated using the matching algorithm. At matches of 90% or greater, the cell lines have very likely originated from the same donor. Samples between 60 and 79% match tend to be unrelated, but need may further investigation to confirm that they are unrelated. Two common causes of related cell lines scoring below 80% are (1) if the cell line has extra alleles due to it being MSI unstable, and (2) misidentification of the cell line's origin. Generally, cell lines are authentic (i.e., are derived from the same original tissue donor) when they show the expected percent match ( $\geq 80\%$  at 13 STR loci or  $> 90\%$  match at eight STR loci) to other results from that donor (tissue or other cell line samples within the database)."
7. The testing results were calculated and generated by each cell database ONLINE tool. In some case, there may be different profiles of same cell line in each database and possibly lead to different matching results. In addition, limited by the algorithm of the calculation model (the less the number of shared STR sites, the higher the probability of matching unrelated cells), non-cell line(s)human cells/sample(s) may also match to cell(s) in database. In these conditions, the comparison results in this report are for reference only.
8. The results are judged according to industry standards or consensus and can only be used for cell line inspection and authentication. We are NOT responsible for any purpose or interpretation other than the purpose specified.

Figure 1: Genotyping of STR and Amelogenin loci in cells

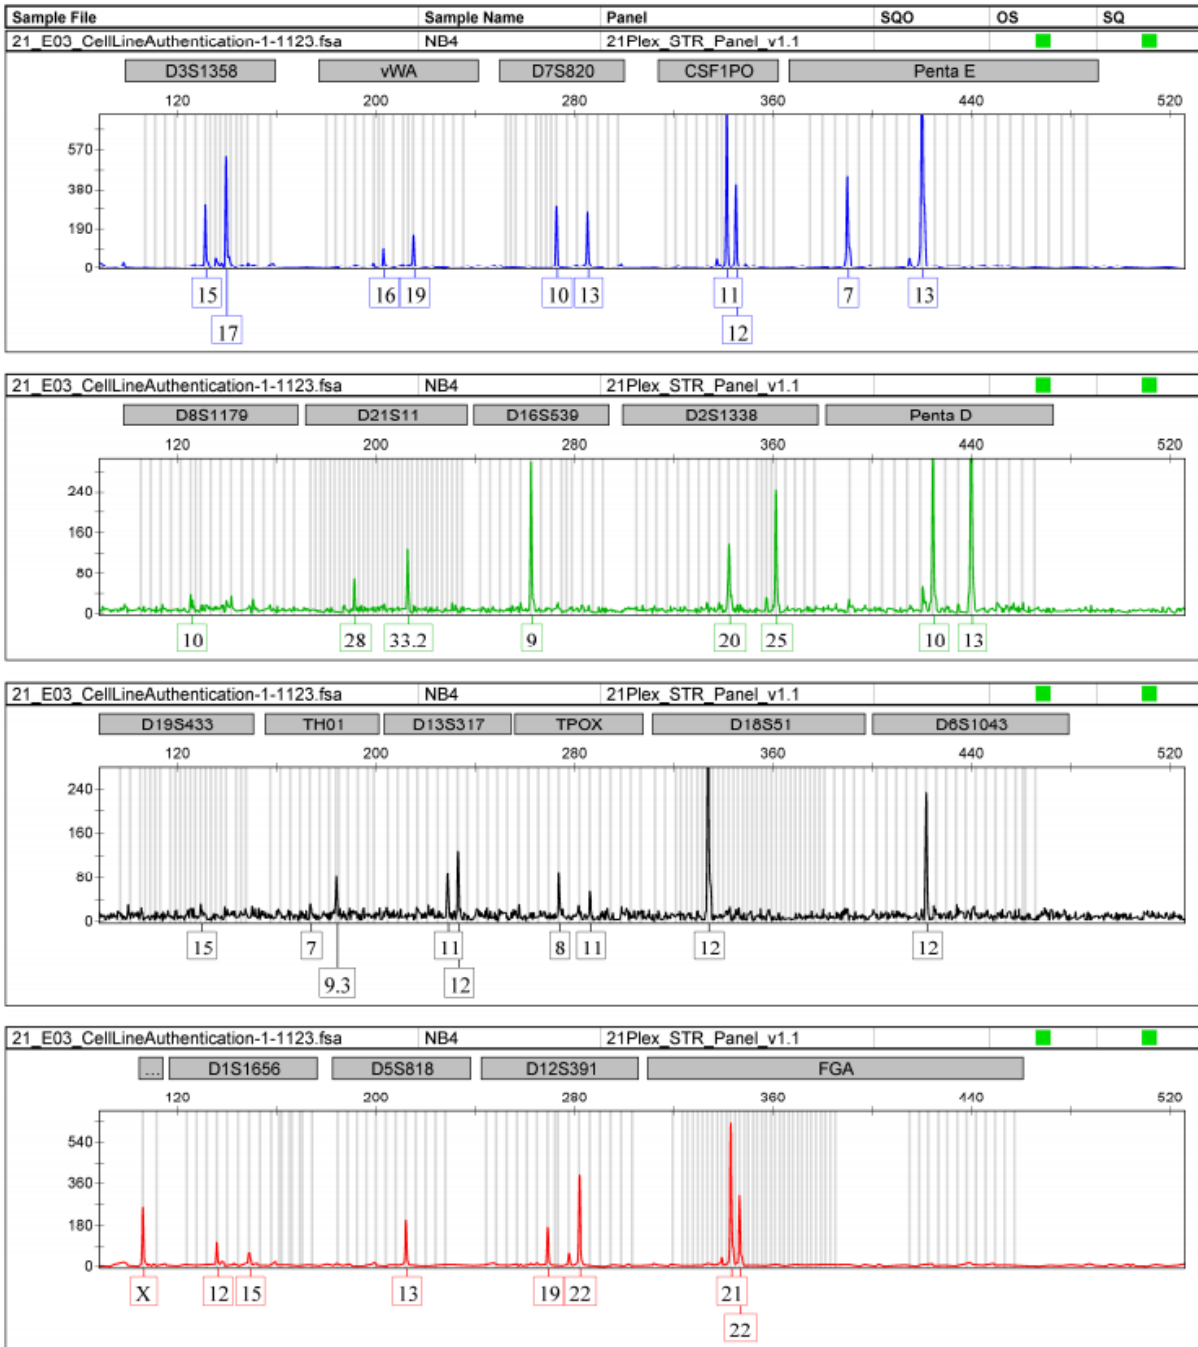



# Short Tandem Repeat (STR) Report

## 1. Sample info.

Sample Label: THP-1

## 2. Data Interpretation

- 1) Human Cell Line Authentication Standardization of Short Tandem Repeat (STR) Profiling ASN-0002 Revised version 2021
- 2) The Pharmacopoeia of the People's Republic of China, Volume III General Requirements, Requirements for Preparation and Control of Animal Cell Substrates Used for Production of Biologics

## 3. Methodology

Sample DNA was extracted with genome extraction kit (Axygen) and PCR amplified with STR Multi-amplification Kit (MicroreaderTM21 ID System). PCR products were assayed with ABI 3730xl DNA Analyzer (Applied Biosystems®). Appropriate positive and negative controls were run and confirmed for each sample submitted. Data of 20 STR loci plus the Amelogenin locus were analyzed and extracted using Gene Mapper ID-X software and designated as the STR profile of the test sample.

## 4. Identify Result

The results of the negative and positive control match expectations.

The STR profiles of the test sample are clear, which are shown in the attached table and figure.

Test results for Multiple Alleles<sup>3</sup>: Number of multiple alleles: 0, Locus: None.

## 5. Explanation of Test Results

- 1) The submitted sample profile is human.
- 2) The submitted profile has a 97% match on 9 loci of the following human cell line(s) in DSMZ database: THP-1.

**Note:** This report is only responsible for the samples submitted for this inspection.

**Conclusion:** According to ATCC ASN-0002-2021, Cell lines with  $\geq 80\%$  match at 13 STR loci or  $\geq 90\%$  match at eight STR loci are considered to be related.

**Results of database comparison (the highest percent match to the query):**

| <b>Genotyping results of STR and Amelogenin loci in cells</b> |                                    |         |         |                              |         |         |
|---------------------------------------------------------------|------------------------------------|---------|---------|------------------------------|---------|---------|
| Loci                                                          | STR information of submitted cells |         |         | STR information of cell bank |         |         |
|                                                               | Submitted cells                    |         |         | Cell bank: THP-1             |         |         |
|                                                               | Allele1                            | Allele2 | Allele3 | Allele1                      | Allele2 | Allele3 |
| D5S818                                                        | 11                                 | 12      |         | 11                           | 12      |         |
| D13S317                                                       | 13                                 | 13      |         | 13                           | 13      |         |
| D7S820                                                        | 10                                 | 10      |         | 10                           | 10      |         |
| D16S539                                                       | 11                                 | 12      |         | 11                           | 12      |         |
| VWA                                                           | 16                                 | 16      |         | 16                           | 16      |         |
| TH01                                                          | 8                                  | 9.3     |         | 8                            | 9.3     |         |
| AMEL                                                          | X                                  | Y       |         | X                            | Y       |         |
| TPOX                                                          | 8                                  | 11      |         | 8                            | 11      |         |
| CSF1PO                                                        | 11                                 | 13      |         | 11                           | 13      |         |
| D12S391                                                       | 19                                 | 19      |         |                              |         |         |
| FGA                                                           | 24                                 | 25      |         |                              |         |         |
| D2S1338                                                       | 17                                 | 18      |         |                              |         |         |
| D21S11                                                        | 30                                 | 31.2    |         |                              |         |         |
| D18S51                                                        | 13                                 | 14      |         |                              |         |         |
| D8S1179                                                       | 10                                 | 14      |         |                              |         |         |
| D3S1358                                                       | 15                                 | 17      |         |                              |         |         |
| D6S1043                                                       | 14                                 | 14      |         |                              |         |         |
| PENTAE                                                        | 11                                 | 15      |         |                              |         |         |
| D19S433                                                       | 12.2                               | 13      |         |                              |         |         |
| PENTAD                                                        | 10                                 | 12      |         |                              |         |         |
| D1S1656                                                       | 16                                 | 17      |         |                              |         |         |

## Remarks

1. The short tandem repeat (STR) profile is indicative only of the sample sent to Suzhou Haixing Co., Ltd at the time it was sent. Effective peaks are real PCR bands, small peaks and non-specific bands are ignored in calculation.
2. The STR genotyping profile of the submitted cell is compared with ATCC, DSMZ and ExPASy databases, in which STR genotypes of over 100,000 human cell lines from ATCC, DSMZ, JCRB, ECACC, Riken etc. were recorded. Cells that are not included in above databases could not be compared. For failed sample, it's genotyping and figure result would be shown as NA.
3. Both mixed cultures and MSI positive cell lines can show additional STR alleles in one or more STR loci. In short, two fundamentally different causes can be the reason for multiple alleles at a locus: drifted alleles by MSI or some other DNA replication error or the presence of a mixed culture containing a contaminating second human cell line.
4. The number of STR loci shared by the submitted sample and the cells in database. Amelogenin does not belong to STR locus.
5. The matching score of DSMZ and ExPASyis "Tanabe"—  $2 \times (\text{number of alleles matching}) / (\text{total number of alleles in database profile and query sample}) \times 100\%$ . The matching score of ATCC is  $(\text{the number of shared alleles between query sample and database profile}) / (\text{total number of alleles in database profile}) \times 100\%$ .
6. The interpretation is based on "ATCC ASN-0002-2021". "Two samples are considered possibly related when their STR profiles match at 80-90% of alleles across the 13 core STR loci, as calculated using the matching algorithm. At matches of 90% or greater, the cell lines have very likely originated from the same donor. Samples between 60 and 79% match tend to be unrelated, but need may further investigation to confirm that they are unrelated. Two common causes of related cell lines scoring below 80% are (1) if the cell line has extra alleles due to it being MSI unstable, and (2) misidentification of the cell line's origin. Generally, cell lines are authentic (i.e., are derived from the same original tissue donor) when they show the expected percent match ( $\geq 80\%$  at 13 STR loci or  $> 90\%$  match at eight STR loci) to other results from that donor (tissue or other cell line samples within the database)."
7. The testing results were calculated and generated by each cell database ONLINE tool. In some case, there may be different profiles of same cell line in each database and possibly lead to different matching results. In addition, limited by the algorithm of the calculation model (the less the number of shared STR sites, the higher the probability of matching unrelated cells), non-cell line(s)human cells/sample(s) may also match to cell(s) in database. In these conditions, the comparison results in this report are for reference only.
8. The results are judged according to industry standards or consensus and can only be used for cell line inspection and authentication. We are NOT responsible for any purpose or interpretation other than the purpose specified.

Figure 1: Genotyping of STR and Amelogenin loci in cells

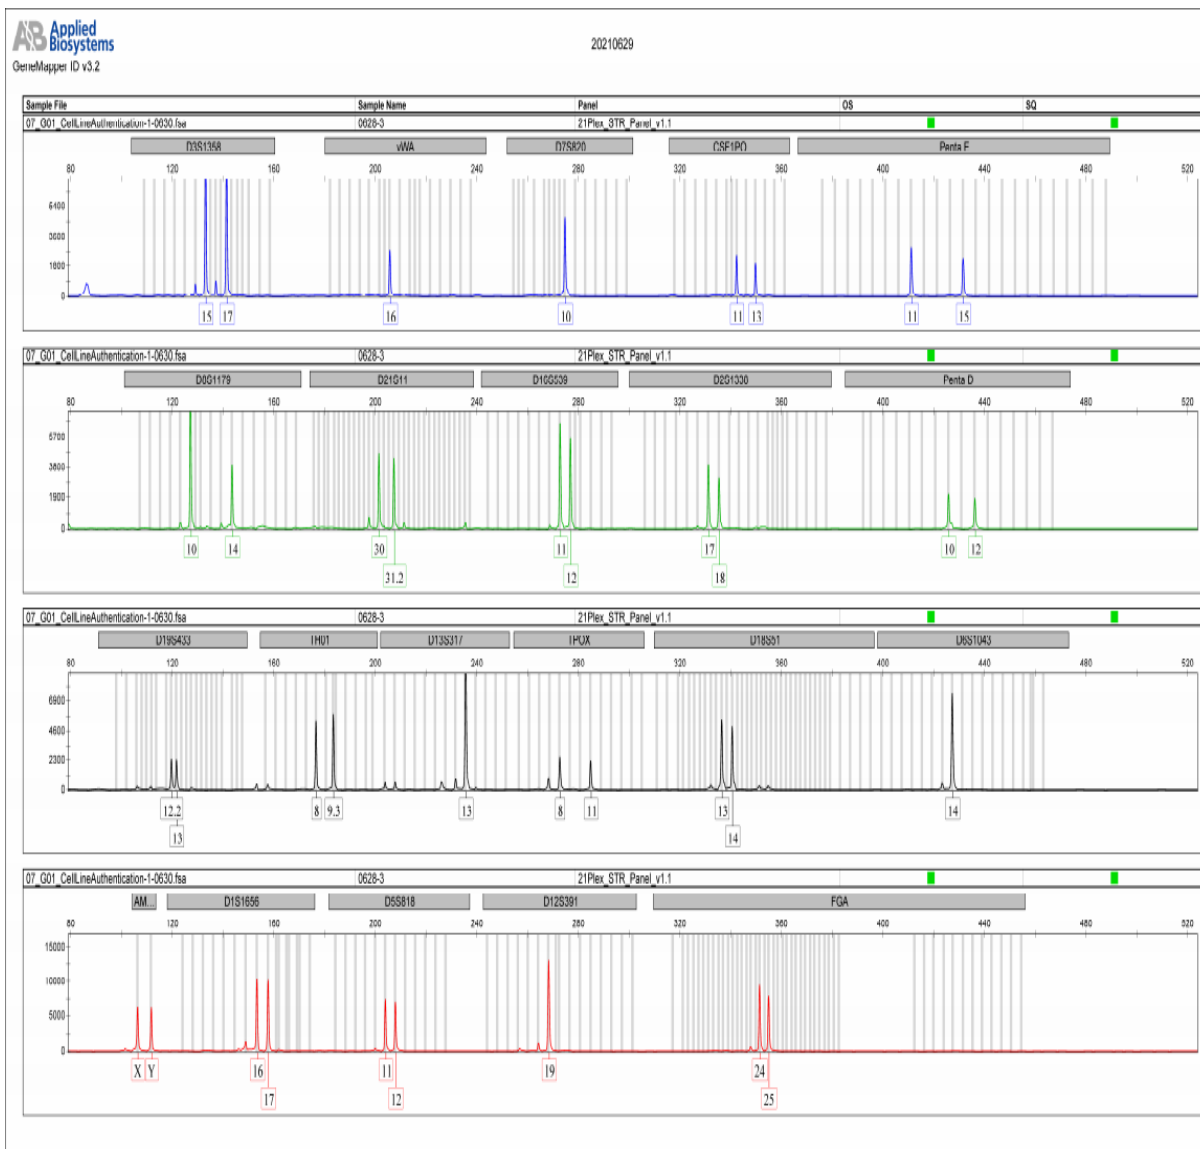

# Short Tandem Repeat (STR) Report

## 1. Sample info.

Sample Label: U937

## 2. Data Interpretation

- 1) Human Cell Line Authentication Standardization of Short Tandem Repeat (STR) Profiling ASN-0002 Revised version 2021
- 2) The Pharmacopoeia of the People's Republic of China, Volume III General Requirements, Requirements for Preparation and Control of Animal Cell Substrates Used for Production of Biologics

## 3. Methodology

Sample DNA was extracted with genome extraction kit (Axygen) and PCR amplified with STR Multi-amplification Kit (MicroreaderTM21 ID System). PCR products were assayed with ABI 3730xl DNA Analyzer (Applied Biosystems®). Appropriate positive and negative controls were run and confirmed for each sample submitted. Data of 20 STR loci plus the Amelogenin locus were analyzed and extracted using Gene Mapper ID-X software and designated as the STR profile of the test sample.

## 4. Identify Result

The results of the negative and positive control match expectations.

The STR profiles of the test sample are clear, which are shown in the attached table and figure.

Test results for Multiple Alleles<sup>3</sup>: Number of multiple alleles: 0, Locus: None.

## 5. Explanation of Test Results

- 1) The submitted sample profile is human.
- 2) The submitted profile has a 100% match on 9 loci of the following human cell line(s) in DSMZ database: U937.

**Note:** This report is only responsible for the samples submitted for this inspection.

**Conclusion:** According to ATCC ASN-0002-2021, Cell lines with  $\geq 80\%$  match at 13 STR loci or  $\geq 90\%$  match at eight STR loci are considered to be related.

**Results of database comparison (the highest percent match to the query):**

| <b>Genotyping results of STR and Amelogenin loci in cells</b> |                                    |         |         |                              |         |         |
|---------------------------------------------------------------|------------------------------------|---------|---------|------------------------------|---------|---------|
| Loci                                                          | STR information of submitted cells |         |         | STR information of cell bank |         |         |
|                                                               | Submitted cells                    |         |         | Cell bank: U937              |         |         |
|                                                               | Allele1                            | Allele2 | Allele3 | Allele1                      | Allele2 | Allele3 |
| D19S433                                                       | 14                                 | 16      |         |                              |         |         |
| D5S818                                                        | 12                                 | 12      |         | 12                           | 12      |         |
| D21S11                                                        | 27                                 | 29      |         |                              |         |         |
| D18S51                                                        | 13                                 | 14      |         |                              |         |         |
| D6S1043                                                       | 12                                 | 18      |         |                              |         |         |
| AMEL                                                          | X                                  | X       |         | X                            | X       |         |
| D3S1358                                                       | 16                                 | 16      |         |                              |         |         |
| D13S317                                                       | 10                                 | 12      |         | 10                           | 12      |         |
| D7S820                                                        | 9                                  | 11      |         | 9                            | 11      |         |
| D16S539                                                       | 12                                 | 12      |         | 12                           | 12      |         |
| CSF1PO                                                        | 12                                 | 12      |         | 12                           | 12      |         |
| PentaD                                                        | 12                                 | 13      |         |                              |         |         |
| D2S441                                                        | 10                                 | 10      |         |                              |         |         |
| vWA                                                           | 14                                 | 15      |         | 14                           | 15      |         |
| D8S1179                                                       | 12                                 | 13      |         |                              |         |         |
| TPOX                                                          | 8                                  | 11      |         | 8                            | 11      |         |
| PentaE                                                        | 13                                 | 13      |         |                              |         |         |
| TH01                                                          | 6                                  | 9.3     |         | 6                            | 9.3     |         |
| D12S391                                                       | 17                                 | 18      |         |                              |         |         |
| D2S1338                                                       | 17                                 | 20      |         |                              |         |         |
| FGA                                                           | 22                                 | 25      |         |                              |         |         |

## Remarks

1. The short tandem repeat (STR) profile is indicative only of the sample sent to Suzhou Haixing Co., Ltd at the time it was sent. Effective peaks are real PCR bands, small peaks and non-specific bands are ignored in calculation.
2. The STR genotyping profile of the submitted cell is compared with ATCC, DSMZ and ExPASy databases, in which STR genotypes of over 100,000 human cell lines from ATCC, DSMZ, JCRB, ECACC, Riken etc. were recorded. Cells that are not included in above databases could not be compared. For failed sample, it's genotyping and figure result would be shown as NA.
3. Both mixed cultures and MSI positive cell lines can show additional STR alleles in one or more STR loci. In short, two fundamentally different causes can be the reason for multiple alleles at a locus: drifted alleles by MSI or some other DNA replication error or the presence of a mixed culture containing a contaminating second human cell line.
4. The number of STR loci shared by the submitted sample and the cells in database. Amelogenin does not belong to STR locus.
5. The matching score of DSMZ and ExPASyis "Tanabe"—  $2 \times (\text{number of alleles matching}) / (\text{total number of alleles in database profile and query sample}) \times 100\%$ . The matching score of ATCC is  $(\text{the number of shared alleles between query sample and database profile}) / (\text{total number of alleles in database profile}) \times 100\%$ .
6. The interpretation is based on "ATCC ASN-0002-2021". "Two samples are considered possibly related when their STR profiles match at 80-90% of alleles across the 13 core STR loci, as calculated using the matching algorithm. At matches of 90% or greater, the cell lines have very likely originated from the same donor. Samples between 60 and 79% match tend to be unrelated, but need may further investigation to confirm that they are unrelated. Two common causes of related cell lines scoring below 80% are (1) if the cell line has extra alleles due to it being MSI unstable, and (2) misidentification of the cell line's origin. Generally, cell lines are authentic (i.e., are derived from the same original tissue donor) when they show the expected percent match ( $\geq 80\%$  at 13 STR loci or  $> 90\%$  match at eight STR loci) to other results from that donor (tissue or other cell line samples within the database)."
7. The testing results were calculated and generated by each cell database ONLINE tool. In some case, there may be different profiles of same cell line in each database and possibly lead to different matching results. In addition, limited by the algorithm of the calculation model (the less the number of shared STR sites, the higher the probability of matching unrelated cells), non-cell line(s)human cells/sample(s) may also match to cell(s) in database. In these conditions, the comparison results in this report are for reference only.
8. The results are judged according to industry standards or consensus and can only be used for cell line inspection and authentication. We are NOT responsible for any purpose or interpretation other than the purpose specified.

Figure 1: Genotyping of STR and Amelogenin loci in cells

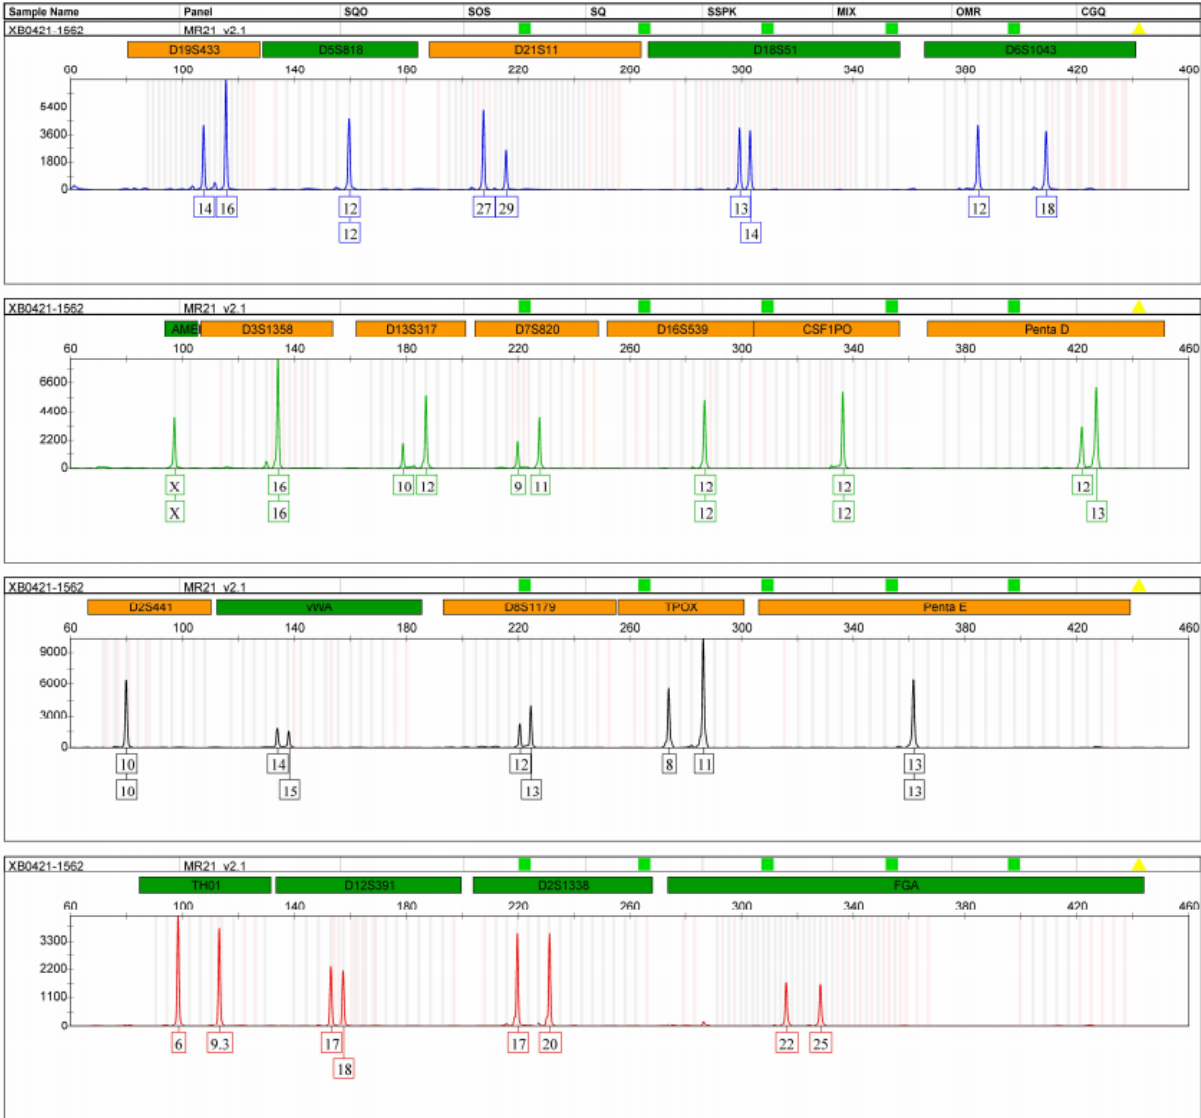



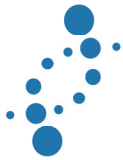

## Cell Line Authentication Service STR Profile Report

**Sample Submitted By:** Dr. Zuokang Zheng  
Zhejiang Meisen Cell Technology Co.,Ltd.  
**Email Address:** 947638289@qq.com  
**Sales Order:** 210422C  
**Cell Line Designation:** OCI-AML-2  
**Date Sample Received:** Apr 22<sup>th</sup>, 2021  
**Report Date:** Apr 23<sup>th</sup>, 2021

**Methodology:** Nineteen short tandem repeat (STR) loci plus the gender determining locus, Amelogenin, were amplified using the commercially available EX20 Kit from AGCU. The cell line sample was processed using the ABI Prism® 3130 XL Genetic Analyzer. Data were analyzed using GeneMapper® ID v3.2 software (Applied Biosystems). Appropriate positive and negative controls were run and confirmed for each sample submitted.

**Data Interpretation:** Cell lines were authenticated using Short Tandem Repeat (STR) analysis as described in 2012 in ANSI Standard (ASN-0002) by the ATCC Standards Development Organization (SDO) and in Capes-Davis et al., Match criteria for human cell line authentication: Where do we draw the line? Int J Cancer. 2013;132(11):2510-9.

**GTB™ performs STR Profiling following ISO 9001:2008 and ISO/IEC 17025:2005 quality standards.**

There are no warranties with respect to the services or results supplied, express or implied, including, without limitation, any implied warranty of merchantability or fitness for a particular purpose. Genetic Testing Biotechnology (GTB) is not liable for any damages or injuries resulting from receipt and/or improper, inappropriate, negligent or other wrongful use of the test results supplied, and/or from misidentification, misrepresentation, or lack of accuracy of those results. Your exclusive remedy against GTB and those supplying materials used in the services for any losses or damage of any kind whatsoever, whether in contract, tort, or otherwise, shall be, at GTB's option, refund of the fee paid for such service or repeat of the service.

**NOTE: According to the recommendations of *IJC* on cell line authentication, the report is valid for 3 years since the issue date.**

---

Technical Questions?  
GTB Technical Support  
+86-512-67486171  
service@jsdna.org  
Section 505, Yixin BLD  
SIP, Suzhou, 215123  
Jiangsu, P.R. China

---

Ordering Questions?  
order@jsdna.org  
GTB Corporation  
+86-512-62806339  
Section 303, Yixin BLD  
SIP, Suzhou, 215123  
Jiangsu, P.R. China



# Cell Line Authentication Service STR Profile Report

Sales Order: 210422C

| Loci       | Test Results for Submitted Sample |     | DSMZ Reference Database Profile |     |
|------------|-----------------------------------|-----|---------------------------------|-----|
|            | Query Profile: OCI-AML-2          |     | Database Profile: OCI-AML-2     |     |
| Amelogenin | X                                 | Y   | X                               | Y   |
| D3S1358    | 16                                |     |                                 |     |
| D13S317    | 11                                | 12  | 11                              | 12  |
| D7S820     | 12                                |     | 12                              |     |
| D16S539    | 12                                | 13  | 12                              | 13  |
| Penta E    | 12                                | 14  |                                 |     |
| TPOX       | 11                                |     | 11                              |     |
| TH01       | 6                                 | 9.3 | 6                               | 9.3 |
| D2S1338    | 23                                | 25  |                                 |     |
| CSF1PO     | 10                                | 12  | 10                              | 12  |
| Penta D    | 12                                |     |                                 |     |
| D19S433    | 13                                | 14  |                                 |     |
| vWA        | 14                                | 17  | 14                              | 17  |
| D21S11     | 29                                |     |                                 |     |
| D18S51     | 13                                | 14  |                                 |     |
| D6S1043    | 17                                | 19  |                                 |     |
| D8S1179    | 12                                | 15  |                                 |     |
| D5S818     | 12                                |     | 12                              |     |
| D12S391    | 25                                | 26  |                                 |     |
| FGA        | 19                                | 24  |                                 |     |

The allele match algorithm compares the 8 core loci plus amelogenin only, even though alleles from all loci will be reported when available.

Note: Loci highlighted in grey (8 core STR loci plus Amelogenin) can be made public to verify cell identity. In order to protect the identity of the donor, **please do not publish** the allele calls from all the STR loci tested. The sample match is based on the reference data available at the time of comparison.

### Explanation of Test Results

Cell lines with  $\geq 80\%$  match are considered to be related; i.e., derived from a common ancestry. Cell lines with between a 55% to 80% match require further profiling for authentication of relatedness.

- The submitted sample profile is human, but not a match for any profile in the DSMZ STR database.
- The submitted profile is an exact match for the following human cell line(s) in the DSMZ STR database (8 core loci plus Amelogenin): OCI-AML-2
- The submitted profile is similar to the following DSMZ human cell line(s):

e-Signature Technician:

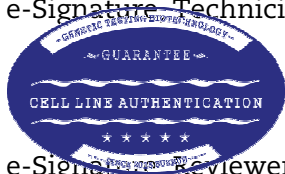

e-Signature Reviewer:

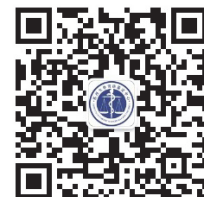

Addendum: Electropherogram for the customer's sample set 1 of 1

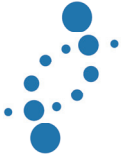

# Cell Line Authentication Service STR Profile Report

**Applied Biosystems**  
GeneMapper ID v3.2

210423

| Sample Name | Panel                  | SQ0 | SQ                                  |
|-------------|------------------------|-----|-------------------------------------|
| OCI-AML-2   | AGCU_EX20_STR_Kit_v1.0 |     | <input checked="" type="checkbox"/> |

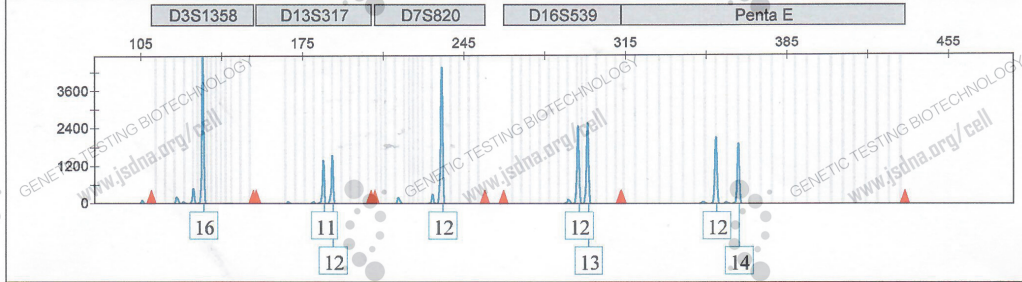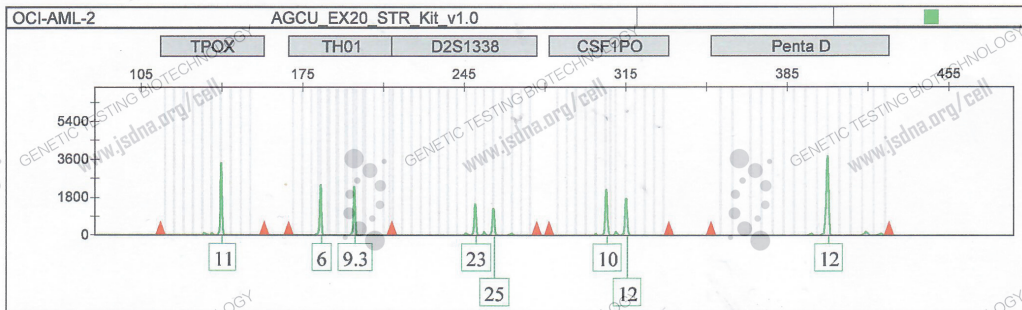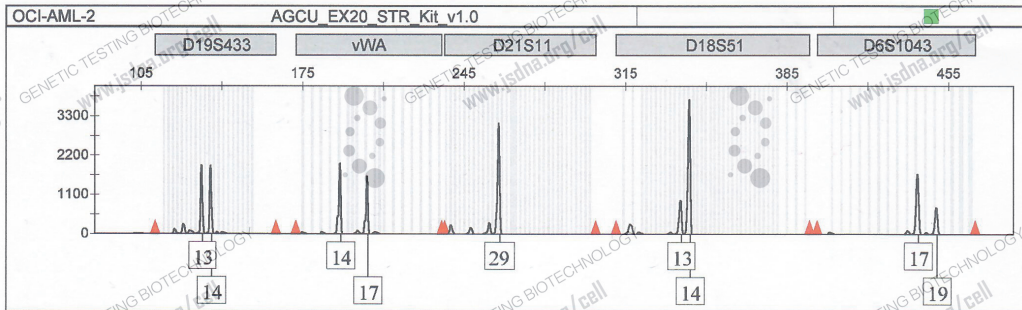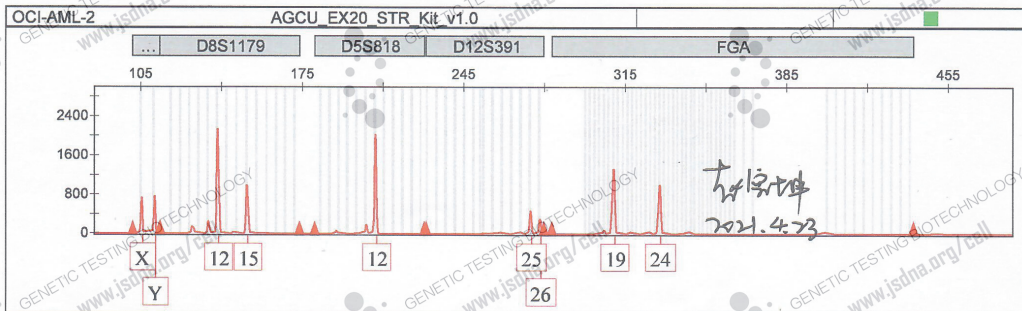

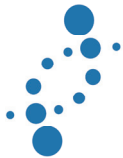

## Cell Line Authentication Service STR Profile Report

### Result of STR matching analysis by your data.

- DSMZ Profile Database -

A graphical presentation is shown at the bottom of this page.

| EV          | Cell No. | Cell name                | Locus names  |              |              |              |              |              |            |              |              | Figures |
|-------------|----------|--------------------------|--------------|--------------|--------------|--------------|--------------|--------------|------------|--------------|--------------|---------|
|             |          |                          | D5S818       | D13S317      | D7S820       | D16S539      | VWA          | TH01         | AM         | TPOX         | CSF1PO       |         |
|             |          | <i>Query (Your Cell)</i> | <b>12,12</b> | <b>11,12</b> | <b>12,12</b> | <b>12,13</b> | <b>14,17</b> | <b>6,9,3</b> | <b>X,Y</b> | <b>11,11</b> | <b>10,12</b> |         |
| 1.00(36/36) | 99       | OCI-AML-2                | <b>12,12</b> | <b>11,12</b> | <b>12,12</b> | <b>12,13</b> | <b>14,17</b> | <b>6,9,3</b> | <b>X,Y</b> | <b>11,11</b> | <b>10,12</b> | -       |
| 0.78(28/36) | CRL-5829 | NCI-H290                 | <b>11,12</b> | <b>11,12</b> | <b>10,12</b> | <b>9,12</b>  | <b>14,17</b> | <b>6,9,3</b> | <b>X,Y</b> | <b>11,11</b> | <b>10,10</b> | -       |
| 0.72(26/36) | CRL-1473 | HT-1197                  | <b>12,12</b> | <b>11,12</b> | <b>11,12</b> | <b>12,13</b> | <b>16,18</b> | <b>6,9,3</b> | <b>X,Y</b> | <b>11,12</b> | <b>11,12</b> | -       |
| 0.72(26/36) | CRL-7681 | Hs 929.Sk                | <b>12,12</b> | <b>9,12</b>  | <b>12,12</b> | <b>12,13</b> | <b>16,17</b> | <b>7,9,3</b> | <b>X,Y</b> | <b>8,11</b>  | <b>10,11</b> | -       |
| 0.72(26/36) | RCB1881  | TL-Mor                   | <b>11,12</b> | <b>11,12</b> | <b>11,12</b> | <b>12,13</b> | <b>14,17</b> | <b>6,9</b>   | <b>X,Y</b> | <b>9,11</b>  | <b>7,12</b>  | -       |
| 0.67(24/36) | 234      | A-427                    | <b>12,12</b> | <b>11,12</b> | <b>8,12</b>  | <b>11,13</b> | <b>17,17</b> | <b>9,9</b>   | <b>X,Y</b> | <b>8,11</b>  | <b>10,12</b> | -       |
| 0.67(24/36) | 303      | SK-MEL-1                 | <b>12,13</b> | <b>11,11</b> | <b>12,12</b> | <b>11,12</b> | <b>16,17</b> | <b>6,6</b>   | <b>X,Y</b> | <b>11,11</b> | <b>12,13</b> | -       |
| 0.67(24/36) | CRL-1498 | CCD-39Lu                 | <b>11,12</b> | <b>11,11</b> | <b>9,12</b>  | <b>11,13</b> | <b>14,17</b> | <b>6,9,3</b> | <b>X,X</b> | <b>8,11</b>  | <b>10,12</b> | -       |
| 0.67(24/36) | CRL-1501 | CCD-39Sk                 | <b>11,12</b> | <b>11,11</b> | <b>9,12</b>  | <b>11,13</b> | <b>14,17</b> | <b>6,9,3</b> | <b>X,X</b> | <b>8,11</b>  | <b>10,12</b> | -       |
| 0.67(24/36) | CRL-1610 | GS-109-V-20              | <b>11,12</b> | <b>12,12</b> | <b>9,12</b>  | <b>11,12</b> | <b>14,17</b> | <b>7,9,3</b> | <b>X,Y</b> | <b>8,11</b>  | <b>10,12</b> | -       |
| 0.67(24/36) | CRL-2097 | CCD-1079Sk               | <b>11,12</b> | <b>11,12</b> | <b>12,12</b> | <b>9,11</b>  | <b>17,18</b> | <b>6,9,3</b> | <b>X,Y</b> | <b>10,11</b> | <b>12,13</b> | -       |
| 0.67(24/36) | CRL-2272 | CHP-234                  | <b>11,12</b> | <b>11,12</b> | <b>8,10</b>  | <b>12,13</b> | <b>15,17</b> | <b>6,9,3</b> | <b>X,X</b> | <b>11,11</b> | <b>12,12</b> | -       |
| 0.67(24/36) | CRL-2503 | NL20                     | <b>12,12</b> | <b>11,12</b> | <b>12,12</b> | <b>12,12</b> | <b>14,17</b> | <b>6,7</b>   | <b>X,X</b> | <b>9,11</b>  | <b>11,11</b> | -       |
| 0.67(24/36) | CRL-2504 | NL20-TA                  | <b>12,12</b> | <b>11,12</b> | <b>12,12</b> | <b>12,12</b> | <b>14,17</b> | <b>6,7</b>   | <b>X,X</b> | <b>9,11</b>  | <b>11,11</b> | -       |
| 0.67(24/36) | CRL-7023 | Hs 39.T                  | <b>12,13</b> | <b>11,12</b> | <b>8,9</b>   | <b>12,13</b> | <b>15,19</b> | <b>6,9,3</b> | <b>X,Y</b> | <b>11,11</b> | <b>11,12</b> | -       |
| 0.67(24/36) | CRL-7671 | Hs 919.Sk                | <b>12,12</b> | <b>11,12</b> | <b>10,10</b> | <b>11,13</b> | <b>16,17</b> | <b>6,9,3</b> | <b>X,X</b> | <b>8,11</b>  | <b>10,12</b> | -       |
| 0.67(24/36) | CRL-7672 | Hs 919.T                 | <b>12,12</b> | <b>11,12</b> | <b>10,10</b> | <b>11,13</b> | <b>16,17</b> | <b>6,9,3</b> | <b>X,X</b> | <b>8,11</b>  | <b>10,12</b> | -       |
| 0.67(24/36) | CRL-7906 | A-427                    | <b>12,12</b> | <b>11,12</b> | <b>8,12</b>  | <b>11,13</b> | <b>17,17</b> | <b>9,9</b>   | <b>X,Y</b> | <b>8,11</b>  | <b>10,12</b> | -       |
| 0.67(24/36) | CRL-9856 | KMA                      | <b>12,13</b> | <b>11,12</b> | <b>11,12</b> | <b>12,13</b> | <b>17,17</b> | <b>6,9</b>   | <b>X,Y</b> | <b>8,9</b>   | <b>10,12</b> | -       |
| 0.67(24/36) | HTB-53   | A-427                    | <b>12,12</b> | <b>11,12</b> | <b>8,12</b>  | <b>11,13</b> | <b>17,17</b> | <b>9,9</b>   | <b>X,Y</b> | <b>8,11</b>  | <b>10,12</b> | -       |
| 0.67(24/36) | HTB-67   | SK-MEL-1                 | <b>12,13</b> | <b>11,11</b> | <b>12,12</b> | <b>11,12</b> | <b>16,17</b> | <b>6,6</b>   | <b>X,Y</b> | <b>11,11</b> | <b>12,13</b> | -       |
| 0.67(24/36) | JCRB9079 | Ran Nor                  | <b>11,12</b> | <b>8,12</b>  | <b>11,12</b> | <b>12,13</b> | <b>15,17</b> | <b>6,7</b>   | <b>X,Y</b> | <b>8,11</b>  | <b>10,12</b> | -       |
| 0.67(24/36) | JCRB9112 | D422T                    | <b>11,12</b> | <b>12,12</b> | <b>9,12</b>  | <b>11,12</b> | <b>14,17</b> | <b>7,9,3</b> | <b>X,Y</b> | <b>8,11</b>  | <b>10,12</b> | -       |



## Cell Line Authentication Service STR Profile Report

**Sample Submitted By:** Dr. Zuokang Zheng  
Zhejiang Meisen Cell Technology Co.,Ltd.  
**Email Address:** 947638289@qq.com  
**Sales Order:** 210422D  
**Cell Line Designation:** OCI-AML-5  
**Date Sample Received:** Apr 22<sup>th</sup>, 2021  
**Report Date:** Apr 23<sup>th</sup>, 2021

**Methodology:** Nineteen short tandem repeat (STR) loci plus the gender determining locus, Amelogenin, were amplified using the commercially available EX20 Kit from AGCU. The cell line sample was processed using the ABI Prism® 3130 XL Genetic Analyzer. Data were analyzed using GeneMapper® ID v3.2 software (Applied Biosystems). Appropriate positive and negative controls were run and confirmed for each sample submitted.

**Data Interpretation:** Cell lines were authenticated using Short Tandem Repeat (STR) analysis as described in 2012 in ANSI Standard (ASN-0002) by the ATCC Standards Development Organization (SDO) and in Capes-Davis et al., Match criteria for human cell line authentication: Where do we draw the line? Int J Cancer. 2013;132(11):2510-9.

**GTB™ performs STR Profiling following ISO 9001:2008 and ISO/IEC 17025:2005 quality standards.**

There are no warranties with respect to the services or results supplied, express or implied, including, without limitation, any implied warranty of merchantability or fitness for a particular purpose. Genetic Testing Biotechnology (GTB) is not liable for any damages or injuries resulting from receipt and/or improper, inappropriate, negligent or other wrongful use of the test results supplied, and/or from misidentification, misrepresentation, or lack of accuracy of those results. Your exclusive remedy against GTB and those supplying materials used in the services for any losses or damage of any kind whatsoever, whether in contract, tort, or otherwise, shall be, at GTB's option, refund of the fee paid for such service or repeat of the service.

**NOTE: According to the recommendations of *JJC* on cell line authentication, the report is valid for 3 years since the issue date.**

---

Technical Questions?  
GTB Technical Support  
+86-512-67486171  
service@jsdna.org  
Section 505, Yixin BLD  
SIP, Suzhou, 215123  
Jiangsu, P.R. China

---

Ordering Questions?  
order@jsdna.org  
GTB Corporation  
+86-512-62806339  
Section 303, Yixin BLD  
SIP, Suzhou, 215123  
Jiangsu, P.R. China



## Cell Line Authentication Service STR Profile Report

Sales Order: 210422D

| Loci       | Test Results for Submitted Sample |      | ExPASy Reference Database Profile |    |
|------------|-----------------------------------|------|-----------------------------------|----|
|            | Query Profile: OCI-AML-5          |      | Database Profile: OCI-AML-5       |    |
| Amelogenin | X                                 | Y    | X                                 | Y  |
| D3S1358    | 18                                |      |                                   |    |
| D13S317    | 11                                | 14   | 11                                | 14 |
| D7S820     | 11                                | 12   | 11                                | 12 |
| D16S539    | 11                                | 13   | 11                                | 13 |
| Penta E    | 13                                | 18   |                                   |    |
| TPOX       | 8                                 | 11   | 8                                 | 11 |
| TH01       | 9.3                               |      | 9.3                               |    |
| D2S1338    | 19                                | 22   |                                   |    |
| CSF1PO     | 10                                | 11   | 10                                | 11 |
| Penta D    | 9                                 |      |                                   |    |
| D19S433    | 12                                | 15.2 |                                   |    |
| vWA        | 16                                | 18   | 16                                | 18 |
| D21S11     | 28                                | 32.2 |                                   |    |
| D18S51     | 15                                | 17   |                                   |    |
| D6S1043    | 11                                | 12   |                                   |    |
| D8S1179    | 13                                | 14   |                                   |    |
| D5S818     | 12                                | 13   | 12                                | 13 |
| D12S391    | 15                                | 22   |                                   |    |
| FGA        | 19                                | 24   |                                   |    |

The allele match algorithm compares the 8 core loci plus amelogenin only, even though alleles from all loci will be reported when available.

Note: Loci highlighted in grey (8 core STR loci plus Amelogenin) can be made public to verify cell identity. In order to protect the identity of the donor, **please do not publish** the allele calls from all the STR loci tested. The sample match is based on the reference data available at the time of comparison.

### Explanation of Test Results

Cell lines with  $\geq 80\%$  match are considered to be related; i.e., derived from a common ancestry. Cell lines with between a 55% to 80% match require further profiling for authentication of relatedness.

- The submitted sample profile is human, but not a match for any profile in the ExPASy STR database.
- The submitted profile is an exact match for the following human cell line(s) in the ExPASy STR database (8 core loci plus Amelogenin): OCI-AML-5
- The submitted profile is similar to the following ExPASy human cell line(s):

e-Signature Technician:

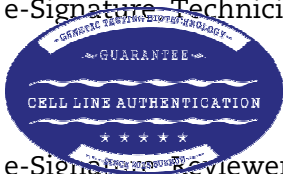

e-Signature Reviewer:

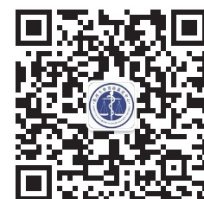

**Addendum:** Electropherogram for the customer's sample set 1 of 1



# Cell Line Authentication Service STR Profile Report

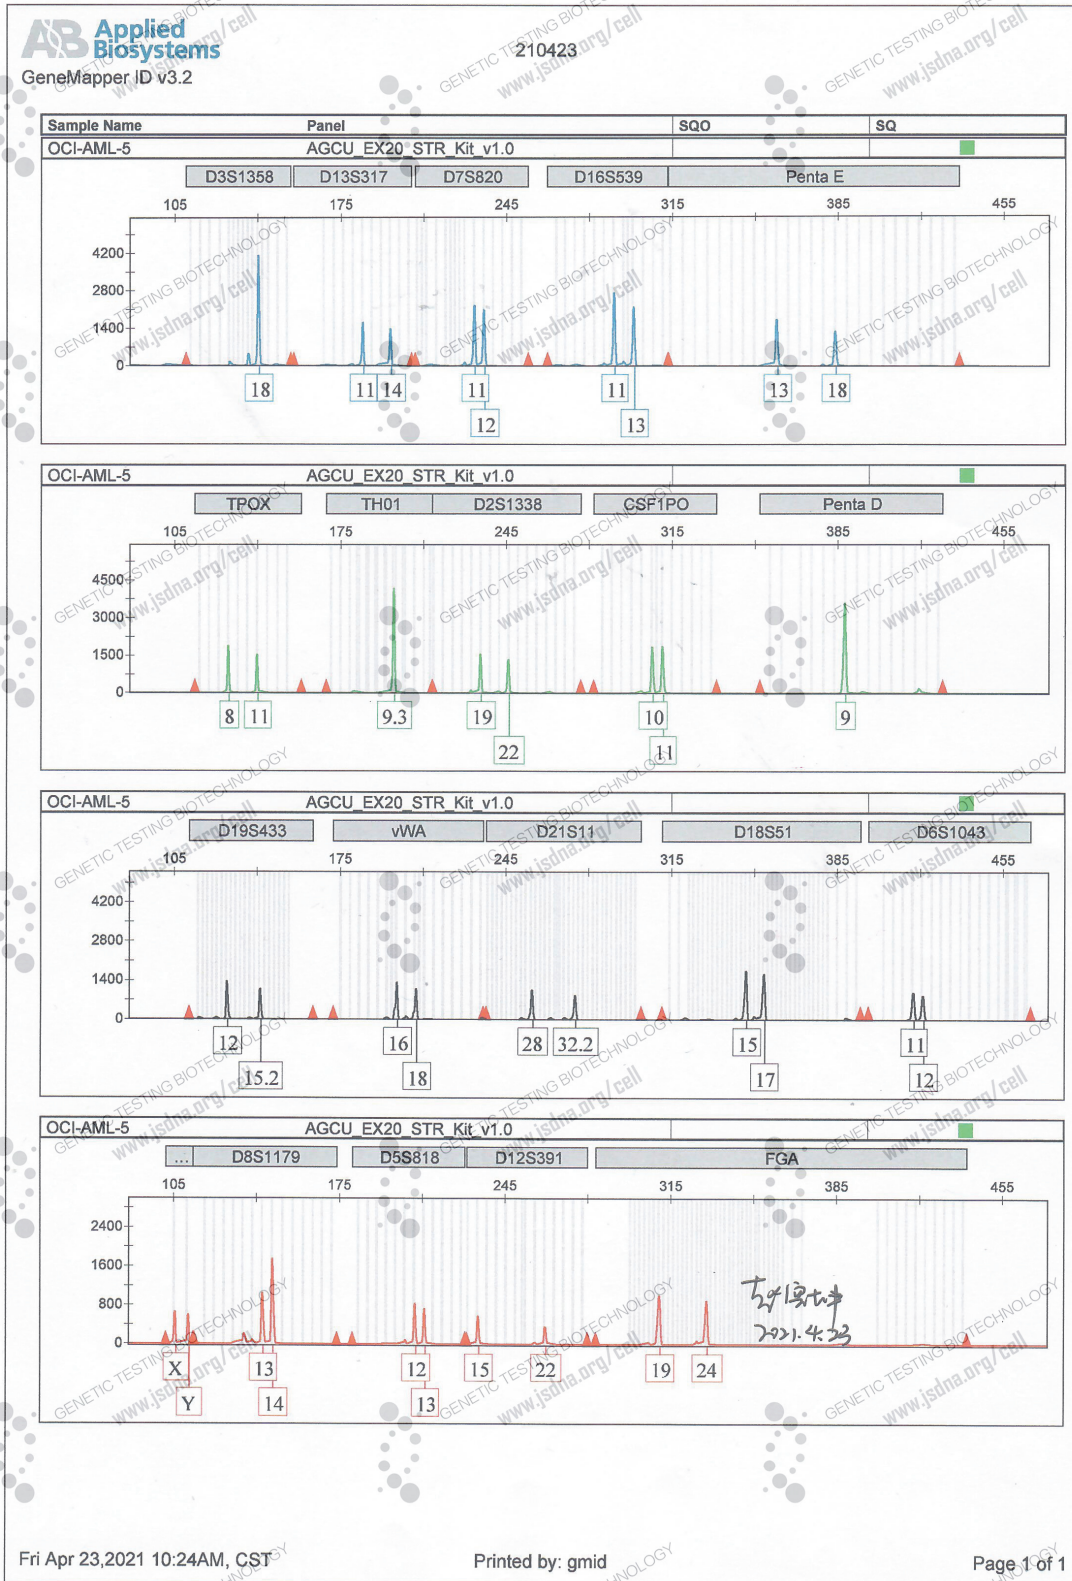

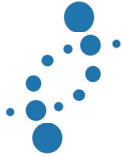

## Cell Line Authentication Service STR Profile Report

| Accession       | Name              | N° Markers | Score   | Amel | CSF1PO | D2S1338 | D3S1358 | D5S818 | D7S820 | D8S1179 | D13S317  | D16S539 | D18S51 | D19S433 | D21S11  | FGA   | Penta D | Penta E | TH01    | TPOX | vWA   |
|-----------------|-------------------|------------|---------|------|--------|---------|---------|--------|--------|---------|----------|---------|--------|---------|---------|-------|---------|---------|---------|------|-------|
| NA              | Query             | NA         | NA      | X,Y  | 10,11  |         |         | 12,13  | 11,12  |         | 11,14    | 11,13   |        |         |         |       |         |         | 9,3,9,3 | 8,11 | 16,18 |
| CVCL_1620 Best  | OCI-AML5          | 9          | 100.00% | X,Y  | 10,11  |         | 18      | 12,13  | 11,12  | 13,14   | 11,14    | 11,13   | 15,17  |         | 28,32,2 | 19,24 | 9       | 13,18   | 9,3     | 8,11 | 16,18 |
| CVCL_1620 Worst | OCI-AML5          | 9          | 97.14%  | X,Y  | 10,11  |         | 18      | 12,13  | 11,12  | 13,14   | 11,14    | 11,13   | 15,17  |         | 28,32,2 | 19,24 | 9       | 13,18   | 7,9,3   | 8,11 | 16,18 |
| CVCL_N708       | BT088             | 9          | 78.79%  | X,Y  | 10,11  |         |         | 12,13  | 11,12  |         | 9        | 11,13   |        |         |         |       |         |         | 8,9     | 8,11 | 18    |
| CVCL_RZ69       | XIFMGG04D         | 9          | 78.79%  | X    | 11,12  |         |         | 12,13  | 11,12  |         | 11       | 11,13   |        |         |         |       |         |         | 7,9,3   | 8,11 | 16,19 |
| CVCL_6316       | C5B7              | 9          | 77.42%  | X,Y  | 9,11   |         |         | 12     | 12     |         | 11,12    | 11,13   |        |         |         |       |         |         | 9,3     | 8    | 16,18 |
| CVCL_5134       | HCC364            | 9          | 77.42%  | X,Y  | 12     | 25      | 14,16   | 12,13  | 10,12  | 12,14   | 11       | 11      | 13     | 13      | 29      | 20,24 | 13      | 12,18   | 9,3     | 8,11 | 16,18 |
| CVCL_3290       | HIAE-65           | 9          | 77.42%  | X    | 10,11  |         |         | 12     | 9,12   |         | 11,14    | 11,13   |        |         |         |       |         |         | 6       | 8    | 16,18 |
| CVCL_3294       | HIVE-65           | 9          | 77.42%  | X    | 10,11  |         |         | 12     | 9,12   |         | 11,14    | 11,13   |        |         |         |       |         |         | 6       | 8    | 16,18 |
| CVCL_0753       | Hs 412.Lu         | 9          | 76.47%  | X,Y  | 10,11  |         |         | 12,13  | 10,11  |         | 9,11     | 12      |        |         |         |       |         |         | 8,9,3   | 8,11 | 16,18 |
| CVCL_A1V1       | ICC4              | 9          | 76.47%  | X,Y  | 10,11  |         | 15      | 11,13  | 11,12  | 13,14   | 10,11    | 11,12   | 12     |         | 27,31,2 | 20,21 | 10,11   | 10,11   | 9,9,3   | 8,11 | 18    |
| CVCL_A9UQ       | GSC#314C          | 9          | 75.00%  | X    | 10     |         |         | 12,13  | 10,12  |         | 11,14    | 11      |        |         |         |       |         |         | 6,9,3   | 8,11 | 16,19 |
| CVCL_A9UR       | GSC#314P          | 9          | 75.00%  | X    | 10     |         |         | 12,13  | 10,12  |         | 11,14    | 11      |        |         |         |       |         |         | 6,9,3   | 8,11 | 16,19 |
| CVCL_RP21       | MESO-3T           | 9          | 75.00%  | X,Y  | 10,11  |         | 18      | 13     | 10,11  | 11,15   | 11       | 11,13   | 13,14  |         | 31,33,2 | 24    | 10      | 7,13    | 6,9,3   | 8,11 | 17    |
| CVCL_1430       | MSTO-211H         | 9          | 75.00%  | X,Y  | 11,12  |         | 15      | 12     | 8,12   | 13      | 11,14    | 13      | 16,18  |         | 28,31   | 21    | 11,12   | 7,13    | 8,9,3   | 11   | 16,18 |
| CVCL_4903       | SUSM-1            | 9          | 75.00%  | X,Y  | 10,11  |         |         | 12,13  | 10,11  |         | 11       | 12      |        |         |         |       |         |         | 8       | 8,11 | 16,18 |
| CVCL_WP79       | ES1070-A          | 9          | 74.29%  | X,Y  | 11,12  |         |         | 12,13  | 9,11   |         | 11,12    | 9,11    |        |         | 27,28   |       |         |         | 8,9,3   | 8,11 | 16,18 |
| CVCL_W72        | MUG-Mel1          | 9          | 73.33%  | X,Y  | 10,11  |         | 17,18   | 12     | 8,11   | 13,14   | 11,12    | 11      | 13,14  |         | 31,31,2 | 21,24 | 9,10    | 5,12    | 9,3     | 8    | 16    |
| CVCL_W73        | MUG-Mel1 clone C8 | 9          | 73.33%  | X,Y  | 10,11  |         | 17,18   | 12     | 8,11   | 13,14   | 11,12    | 11      | 13,14  |         | 31,31,2 | 21,24 | 9,10    | 5,12    | 9,3     | 8    | 16    |
| CVCL_W74        | MUG-Mel1 clone D5 | 9          | 73.33%  | X,Y  | 10,11  |         | 17,18   | 12     | 8,11   | 13,14   | 11,12    | 11      | 13,14  |         | 31,31,2 | 21,24 | 9,10    | 5,12    | 9,3     | 8    | 16    |
| CVCL_1668 Best  | RPMI-8866         | 9          | 73.33%  | X    | 11     |         | 15,16   | 12     | 11,12  | 12,14   | 10,14    | 11      | 12,15  |         | 27,29   | 22,23 |         |         | 9,3     | 8,11 | 14,16 |
| CVCL_1668 Worst | RPMI-8866         | 9          | 66.67%  | X    | 11     |         | 15,16   | 12     | 11,12  | 12,14   | 10,14    | 11      | 12,15  |         | 27,29   | 22,23 |         |         | 10      | 8,11 | 14,16 |
| CVCL_1096 Best  | C2BBel            | 9          | 72.73%  | X    | 11     |         | 14,17   | 12,13  | 11,12  | 12,14   | 11,13,14 | 12,13   | 12     |         | 30      | 19    | 9,11    | 7       | 6       | 9,11 | 16,18 |
